1

## 2 **Structural basis of a public antibody response to SARS-CoV-2**

3

4 Meng Yuan<sup>1,\*</sup>, Hejun Liu<sup>1,\*</sup>, Nicholas C. Wu<sup>1,\*</sup>, Chang-Chun D. Lee<sup>1</sup>, Xueyong Zhu<sup>1</sup>,

5 Fangzhu Zhao<sup>2,3,4</sup>, Deli Huang<sup>2</sup>, Wenli Yu<sup>1</sup>, Yuanzi Hua<sup>1</sup>, Henry Tien<sup>1</sup>,

6 Thomas F. Rogers<sup>2,5</sup>, Elise Landais<sup>2,3,6</sup>, Devin Sok<sup>3,4,6</sup>, Joseph G. Jardine<sup>3,6</sup>, Dennis R.

7 Burton<sup>2,3,4,7</sup>, Ian A. Wilson<sup>1,3,4,8,§</sup>

8

9 <sup>1</sup> Department of Integrative Structural and Computational Biology, The Scripps Research  
10 Institute, La Jolla, CA 92037, USA

11 <sup>2</sup> Department of Immunology and Microbiology, The Scripps Research Institute, La Jolla,  
12 CA 92037, USA

13 <sup>3</sup> IAVI Neutralizing Antibody Center, The Scripps Research Institute, La Jolla, CA 92037,  
14 USA

15 <sup>4</sup> Consortium for HIV/AIDS Vaccine Development (CHAVID), The Scripps Research  
16 Institute, La Jolla, CA 92037, USA

17 <sup>5</sup> Division of Infectious Diseases, Department of Medicine, University of California, San  
18 Diego, La Jolla, CA 92037, USA

19 <sup>6</sup> IAVI, New York, NY10004, USA

20 <sup>7</sup> Ragon Institute of Massachusetts General Hospital, Massachusetts Institute of  
21 Technology, and Harvard University, Cambridge, MA 02139, USA

22 <sup>8</sup> The Skaggs Institute for Chemical Biology, The Scripps Research Institute, La Jolla,  
23 CA, 92037, USA

24 \* These authors contributed equally to this work

25 <sup>§</sup> Correspondence: [wilson@scripps.edu](mailto:wilson@scripps.edu) (I.A.W.)

26 **ABSTRACT**

27 Molecular-level understanding of human neutralizing antibody responses to SARS-CoV-  
28 2 could accelerate vaccine design and facilitate drug discovery. We analyzed 294  
29 SARS-CoV-2 antibodies and found that IGHV3-53 is the most frequently used IGHV  
30 gene for targeting the receptor binding domain (RBD) of the spike (S) protein. We  
31 determined crystal structures of two IGHV3-53 neutralizing antibodies +/- Fab CR3022  
32 ranging from 2.33 to 3.11 Å resolution. The germline-encoded residues of IGHV3-53  
33 dominate binding to the ACE2 binding site epitope with no overlap with the CR3022  
34 epitope. Moreover, IGHV3-53 is used in combination with a very short CDR H3 and  
35 different light chains. Overall, IGHV3-53 represents a versatile public VH in neutralizing  
36 SARS-CoV-2 antibodies, where their specific germline features and minimal affinity  
37 maturation provide important insights for vaccine design and assessing outcomes.

38 **MAIN**

39 The ongoing COVID-19 pandemic, which is caused by severe acute respiratory  
40 syndrome coronavirus 2 (SARS-CoV-2), is far from an end (1). The increasing global  
41 health and socioeconomic damage require urgent development of an effective COVID-  
42 19 vaccine. While multiple vaccine candidates have entered clinical trials (2), the  
43 molecular features that contribute to an effective antibody response are not clear. Over  
44 the past decade, the concept of a public antibody response (also known as multidonor  
45 class antibodies) to specified microbial pathogens has emerged. A public antibody  
46 response describes antibodies that have shared genetic elements and modes of  
47 recognition, and can be observed in multiple individuals against a given antigen. Such  
48 responses to microbial pathogens have been observed against influenza (3), dengue (4),  
49 malaria (5), and HIV (6). Identification of public antibody responses and characterization  
50 of the molecular interactions with cognate antigen can provide insight into the  
51 fundamental understanding of the immune repertoire and its ability to quickly respond to  
52 novel microbial pathogens, as well as facilitate rational vaccine design against these  
53 pathogens (7, 8).

54

55 The spike (S) protein is the major surface antigen of SARS-CoV-2. The S protein utilizes  
56 its receptor-binding domain (RBD) to engage the host receptor ACE2 for viral entry (9-  
57 12). Therefore, RBD-targeting antibodies could neutralize SARS-CoV-2 by blocking  
58 ACE2 binding. A number of antibodies that target the RBD of SARS-CoV-2 have now  
59 been discovered in very recent studies (13-28). We compiled a list of 294 SARS-CoV-2  
60 RBD-targeting antibodies where information on IGHV gene usage is available (17-28)  
61 (Table S2), and found that IGHV3-53 is the most frequently used IGHV gene among  
62 such antibodies (Fig. 1A). Of 294 RBD-targeting antibodies, 10% are encoded by  
63 IGHV3-53, as compared to only 0.5% to 2.6% in the repertoire of naïve healthy

64 individuals (29) with a mean of 1.8% (30). The prevalence of IGHV3-53 in the antibody  
65 response in SARS-CoV-2 patients has also been recognized in some recent antibody  
66 studies (20, 22, 27). These observations indicate that IGHV3-53 represents a frequent  
67 and public antibody response to the SARS-CoV-2 RBD.

68

69 To understand the molecular features that endow IGHV3-53 with the ability to act as a  
70 public antibody, we determined crystal structures of two IGHV3-53 neutralizing  
71 antibodies, namely CC12.1 and CC12.3, in complex with the SARS CoV-2 RBD and also  
72 in the presence of the SARS-CoV1/2 cross-reactive Fab CR3022 (17). CC12.1 and  
73 CC12.3 were previously isolated from a SARS-CoV-2-infected patient and shown to be  
74 SARS-CoV-2 RBD-specific (27). Although CC12.1 and CC12.3 are both encoded by  
75 IGHV3-53, CC12.1 utilizes IGHJ6, IGKV1-9, and IGKJ3, whereas CC12.3 utilizes IGHJ4,  
76 IGKV3-20, and IGKJ1. This variation in IGHJ, IGKV, and IGKJ usage indicates that  
77 CC12.1 and CC12.3 belong to different clonotypes, but are encoded by a common  
78 IGHV3-53 germline gene. IgBlast analysis (31) shows that IGHV and IGKV of CC12.1  
79 are only 1% somatically mutated at the nucleotide sequence level (two amino-acid  
80 changes each). Similarly, the IGHV and IGKV of CC12.3 are also minimally somatically  
81 mutated at 1.4% in both IGHV (four amino-acid changes) and IGKV (a single amino-acid  
82 deletion). The binding affinities ( $K_d$ ) of Fabs CC12.1 and CC12.3 to SARS-CoV-2 RBD  
83 are 17 nM and 14 nM, respectively (Fig. S2). Moreover, competition experiments  
84 suggest that CC12.1 and CC12.3 bind to a similar epitope, which overlaps with the  
85 ACE2 binding site, but not the CR3022 epitope (Fig. S3).

86

87 We determined four complex crystal structures, CC12.1/RBD, CC12.3/RBD,  
88 CC12.1/RBD/CR3022, and CC12.3/RBD/CR3022 at resolutions of 3.11 Å, 2.33 Å, 2.90  
89 Å, and 2.70 Å, respectively (Table S1). CC12.1 and CC12.3 bind to the ACE2 binding

90 site on SARS-CoV-2 RBD with an identical angle of approach (Fig. 1B-F). Interestingly,  
91 another IGHV3-53 antibody B38, whose structure was determined recently (23), also  
92 binds to the ACE2 binding site on SARS-CoV-2 RBD in a similar manner (Fig. S4).  
93 Similar to the ACE2 binding site (11), the epitopes of these antibodies can only be  
94 accessed when the RBD is in the “up” conformation (Fig. S5). Among 16 ACE2 binding  
95 residues on RBD, 10 are within the epitopes of CC12.1 and B38, and 6 are in the  
96 epitope of CC12.3 (Fig. 2A-D). Many of the epitope residues are not conserved between  
97 SARS-CoV-2 and SARS-CoV (Fig. 2E), explaining their lack of cross-reactivity (27). The  
98 buried surface area (BSA) from the heavy-chain interaction is quite similar in CC12.1  
99 ( $723 \text{ \AA}^2$ ), CC12.3 ( $698 \text{ \AA}^2$ ), and B38 ( $713 \text{ \AA}^2$ ). In contrast, the light-chain interaction is  
100 much smaller for CC12.3 ( $176 \text{ \AA}^2$ ) compared to CC12.1 ( $566 \text{ \AA}^2$ ) and B38 ( $495 \text{ \AA}^2$ ),  
101 consistent with different light-chain gene usage. While both CC12.1 and B38 utilize  
102 IGKV1-9, CC12.3 utilizes IGKV3-20. This observation suggests that IGHV3-53 can pair  
103 with different light chains to target the ACE2 binding site of the SARS-CoV-2 RBD.  
104 Given that CC12.3 (80% BSA from the heavy chain) binds the RBD with similar affinity to  
105 CC12.1 (56% BSA from heavy chain) (Fig. S2), the light-chain identity seems not to be  
106 as critical as the heavy chain. In fact, among the RBD-targeting IGHV3-53 antibodies,  
107 nine different light chains are observed, although IGKV1-9 and IGKV3-20 are the most  
108 frequently found to date (Fig. S6).

109

110 To understand why IGHV3-53 is elicited as a public antibody response, the molecular  
111 interactions between the RBD and the heavy chains of CC12.1, CC12.3, and B38 were  
112 analyzed. The complementarity-determining regions (CDR) H1 and H2 of these  
113 antibodies interact extensively with the RBD mainly through specific hydrogen bonds  
114 (Fig. 3A-B). Interestingly, all residues on CDR H1 and H2 that hydrogen bond with the  
115 RBD are encoded by the germline IGHV3-53 (Fig. S1 and S7, Table S3). These

116 interactions are almost identical among CC12.1, CC12.3, and B38 with the only  
117 difference at V<sub>H</sub> residue 58. A somatic mutation V<sub>H</sub> Y58F is present in both CC12.1 and  
118 CC12.3, but not in B38 (Fig. 3A-C, boxed residues). Nevertheless, this somatic mutation  
119 is unlikely to be essential for IGHV3-53 to engage the RBD, since V<sub>H</sub> residue 58 in B38  
120 still interacts with the RBD through an additional hydrogen bond (Fig. 3C). Of note, none  
121 of these antibody interactions mimic ACE2 binding (Fig. 3D).

122

123 Our structural analysis reveals two key motifs in the IGHV3-53 germline sequence that  
124 are important for RBD binding, namely an NY motif at V<sub>H</sub> residues 32 and 33 in the CDR  
125 H1, and an SGGS motif at V<sub>H</sub> residues 53 to 56 in the CDR H2 (Fig. S8). The side chain  
126 of V<sub>H</sub> N32 in the NY motif forms a hydrogen bond with the backbone carbonyl of A475 on  
127 the RBD, and this interaction is stabilized by an extensive network of hydrogen bonds  
128 with other antibody residues as well as a bound water molecule (Fig. 4A). V<sub>H</sub> N32 also  
129 hydrogen bonds with V<sub>H</sub> R94, which in turn hydrogen bonds with N487 and Y489 on the  
130 RBD (Fig. 4A). These interactions enhance not only RBD-Fab interaction, but also  
131 stabilize CDR and framework residues and conformations. V<sub>H</sub> Y33 in the NY motif  
132 inserts into a hydrophobic cage formed by RBD residues Y421, F456, L455 and the  
133 aliphatic component of K417 (Fig. 4B). A hydrogen bond between V<sub>H</sub> Y33 and the  
134 carbonyl oxygen of L455 on RBD further strengthens the interaction. The second key  
135 motif SGGS in CDR H2 forms extensive hydrogen bond network with the RBD (Fig. 4C),  
136 including four hydrogen bonds that involve the hydroxyl side chains of V<sub>H</sub> S53 and V<sub>H</sub>  
137 S56, and four water-mediated hydrogen bonds to the backbone carbonyl of V<sub>H</sub> G54, the  
138 backbone amide of V<sub>H</sub> S56, and the side chain of V<sub>H</sub> S56. Along with V<sub>H</sub> Y52, the SGGS  
139 motif takes part in a type I beta turn, with a positive  $\Phi$ -angle for V<sub>H</sub> G55 at the end of the  
140 turn. In addition, the C $\alpha$  of V<sub>H</sub> G54 is only 4 Å away from the RBD, indicating that side  
141 chains of other amino acids would clash with the RBD if they were present at this

142 position. As a result, the SGGS motif is a perfect fit for interacting with the RBD at this  
143 location.

144

145 Overall, these observations demonstrate the importance of the NY and SGGS motifs,  
146 which are both encoded in the IGHV3-53 germline, for engaging the RBD. In fact,  
147 besides IGHV3-53, the only other IGHV gene that contains an NY motif in CDR H1 and  
148 an SGGS motif in CDR H2 is IGHV3-66, which is a closely-related IGHV gene to IGHV3-  
149 53 (32). As compared to IGHV3-53, IGHV3-66 has a lower occurrence frequency in the  
150 repertoire of healthy individuals (0.3% to 1.7%) (29), which may explain why IGHV3-66  
151 is less prevalent than IGHV3-53, but yet is still quite commonly observed (19-22, 24, 26)  
152 in antibodies in SARS-CoV-2 patients (Fig. 1A). Overall, our structural analysis has  
153 identified two germline-encoded binding motifs that enable IGHV3-53 to act as a public  
154 antibody and target the SARS CoV-2 RBD with no mutations required from affinity  
155 maturation.

156

157 While the binding mode of CDR H1 and H2 to RBD is highly similar among CC12.1,  
158 CC12.3, and B38, CDR H3 interaction with the RBD is different (Fig. 3A-C) due to  
159 differences in the CDR H3 sequences and conformations (Fig. 5A-B). For example,  
160 while CDR H3 of CC12.1 can interact with RBD Y453 through a hydrogen bond, CDR  
161 H3s of CC12.3 and B38 do not form such a hydrogen bond (Fig. 3A-C). Similarly, due to  
162 the difference in light-chain gene usage, the light-chain interactions with the RBD can  
163 vary substantially in IGHV3-53 antibodies (Fig. S9). Overall, our structural analysis  
164 demonstrates that IGHV3-53 provides a highly versatile framework for antibodies to  
165 target the ACE2 binding site in SARS-CoV-2 RBD.

166

167 An interesting feature of CC12.1 and CC12.3 is their relatively short CDR H3. While the  
168 CDR H3 sequences of CC12.1 and CC12.3 are very different, both have a length of nine  
169 amino acids (Kabat numbering), whereas the average CDR H3 length for human  
170 antibodies is around 13 (33), as compared to for example very long CDR H3s (up to 30  
171 residues) on average that seem to be required for many broadly neutralizing antibodies  
172 to HIV-1 (34). Similarly, antibody B38 has a very short CDR H3 length of seven residues  
173 (23). It is unlikely that longer CDR H3's can be accommodated in these antibodies since  
174 their epitopes are relatively flat with no large pocket to insert a protruding CDR (Fig. 2A-  
175 C). This conclusion was also arrived in a recent study that also reported SARS-CoV-2  
176 RBD-targeting antibodies that are encoded by either IGHV3-53 or IGHV3-66 tend to  
177 have a short CDR H3 (28). In fact, IGHV3-53 and IGHV3-66 antibodies in general have  
178 slightly shorter than average CDR H3's (by around one residue), but do appear to have  
179 a few much shorter CDR H3's (<10 amino acids) than average in the baseline antibody  
180 repertoire (30). In CC12.1 and CC12.3, the space for CDR H3 to fit in the interface within  
181 the RBD is limited (Fig. 5A-B), which thus constrains its length. Consistently, among  
182 RBD-targeting antibodies currently reported (17-28), those encoded by IGHV3-53 have a  
183 significantly shorter CDR H3 compared to those encoded by other IGHV genes (p-value  
184 = 6e-8, Mann-Whitney U test) (Fig. 5C). These observations provide structural and  
185 statistical evidence that a short CDR H3 length is a molecular feature of the IGHV3-53-  
186 encoded public antibody response to the SARS-CoV-2 RBD, reminiscent of a short 5-  
187 residue CDR L3 in IGHV1-2 antibodies to the CD4 receptor binding site in gp120 of HIV-  
188 1 Env (35).

189

190 Besides IGHV3-53, several other IGHV genes such as IGHV1-2, IGHV3-9, and IGHV3-  
191 30 are also more frequently observed than other germlines in SARS-CoV-2 RBD-  
192 targeting antibodies (Fig. 1A). The molecular mechanisms of these antibody responses



193 to SARS-CoV-2 will need to be characterized in the future. In addition, whether other  
194 antibody germline gene segments, including the IGHD and the light chain, contribute to  
195 public antibody responses to SARS-CoV-2 will also need to be further addressed.  
196 Notwithstanding, the detailed characterization of this public antibody response to SARS  
197 CoV-2 is already be a promising starting point for rational vaccine design (36), especially  
198 given limited to no affinity maturation is required from the germline to achieve a high  
199 affinity neutralizing antibody response to the RBD. In addition, IGHV3-53 exists at a  
200 reasonable frequency in healthy individuals (29, 30), indicating that this public antibody  
201 could be commonly elicited during vaccination (37), and aid in design of both antibody  
202 and small molecule therapeutics (7, 38).

203

## 204 REFERENCES

- 205 1. S. M. Kissler, C. Tedijanto, E. Goldstein, Y. H. Grad, M. Lipsitch, Projecting the  
206 transmission dynamics of SARS-CoV-2 through the postpandemic period.  
207 *Science* 10.1126/science.abb5793 (2020).
- 208 2. N. Lurie, M. Saville, R. Hatchett, J. Halton, Developing COVID-19 vaccines at  
209 pandemic speed. *N Engl J Med* **382**, 1969-1973 (2020).
- 210 3. S. F. Andrews, A. B. McDermott, Shaping a universally broad antibody response  
211 to influenza amidst a variable immunoglobulin landscape. *Curr Opin Immunol* **53**,  
212 96-101 (2018).
- 213 4. P. Parameswaran *et al.*, Convergent antibody signatures in human dengue. *Cell*  
214 *Host Microbe* **13**, 691-700 (2013).
- 215 5. K. Pieper *et al.*, Public antibodies to malaria antigens generated by two LAIR1  
216 insertion modalities. *Nature* **548**, 597-601 (2017).
- 217 6. I. Setliff *et al.*, Multi-donor longitudinal antibody repertoire sequencing reveals the  
218 existence of public antibody clonotypes in HIV-1 infection. *Cell Host Microbe* **23**,  
219 845-854 e846 (2018).
- 220 7. N. C. Wu, I. A. Wilson, Structural insights into the design of novel anti-influenza  
221 therapies. *Nat Struct Mol Biol* **25**, 115-121 (2018).
- 222 8. A. Lanzavecchia, A. Fruhwirth, L. Perez, D. Corti, Antibody-guided vaccine  
223 design: identification of protective epitopes. *Curr Opin Immunol* **41**, 62-67 (2016).

- 224 9. P. Zhou *et al.*, A pneumonia outbreak associated with a new coronavirus of  
225 probable bat origin. *Nature* **579**, 270-273 (2020).
- 226 10. M. Letko, A. Marzi, V. Munster, Functional assessment of cell entry and receptor  
227 usage for SARS-CoV-2 and other lineage B betacoronaviruses. *Nat Microbiol* **5**,  
228 562-569 (2020).
- 229 11. R. Yan *et al.*, Structural basis for the recognition of the SARS-CoV-2 by full-  
230 length human ACE2. *Science* **367**, 1444-1448 (2020).
- 231 12. J. Lan *et al.*, Structure of the SARS-CoV-2 spike receptor-binding domain bound  
232 to the ACE2 receptor. *Nature* **581**, 215-220 (2020).
- 233 13. W. Li *et al.*, Potent neutralization of SARS-CoV-2 in vitro and in an animal model  
234 by a human monoclonal antibody. *bioRxiv* 10.1101/2020.05.13.093088 (2020).
- 235 14. E. Andreano *et al.*, Identification of neutralizing human monoclonal antibodies  
236 from Italian Covid-19 convalescent patients. *bioRxiv* 10.1101/2020.05.05.078154  
237 (2020).
- 238 15. S. J. Zost *et al.*, Rapid isolation and profiling of a diverse panel of human  
239 monoclonal antibodies targeting the SARS-CoV-2 spike protein. *bioRxiv*  
240 10.1101/2020.05.12.091462 (2020).
- 241 16. A. Z. Wec *et al.*, Broad sarbecovirus neutralizing antibodies define a key site of  
242 vulnerability on the SARSCoV-2 spike protein. *bioRxiv*  
243 10.1101/2020.05.15.096511 (2020).
- 244 17. M. Yuan *et al.*, A highly conserved cryptic epitope in the receptor-binding  
245 domains of SARS-CoV-2 and SARS-CoV. *Science* **368**, 630-633 (2020).
- 246 18. D. Pinto *et al.*, Cross-neutralization of SARS-CoV-2 by a human monoclonal  
247 SARS-CoV antibody. *Nature* 10.1038/s41586-020-2349-y (2020).
- 248 19. B. Ju *et al.*, Human neutralizing antibodies elicited by SARS-CoV-2 infection.  
249 *Nature* 10.1038/s41586-020-2380-z (2020).
- 250 20. Y. Cao *et al.*, Potent neutralizing antibodies against SARS-CoV-2 identified by  
251 high-throughput single-cell sequencing of convalescent patients' B cells. *Cell*  
252 10.1016/j.cell.2020.05.025 (2020).
- 253 21. P. J. M. Brouwer *et al.*, Potent neutralizing antibodies from COVID-19 patients  
254 define multiple targets of vulnerability. *bioRxiv* 10.1101/2020.05.12.088716  
255 (2020).
- 256 22. D. F. Robbiani *et al.*, Convergent antibody responses to SARS-CoV-2 infection in  
257 convalescent individuals. *bioRxiv* 10.1101/2020.05.13.092619 (2020).
- 258 23. Y. Wu *et al.*, A noncompeting pair of human neutralizing antibodies block COVID-  
259 19 virus binding to its receptor ACE2. *Science* 10.1126/science.abc2241 (2020).

- 260 24. X. Chi *et al.*, A potent neutralizing human antibody reveals the N-terminal domain  
261 of the Spike protein of SARS-CoV-2 as a site of vulnerability. *bioRxiv*  
262 10.1101/2020.05.08.083964 (2020).
- 263 25. E. Seydoux *et al.*, Characterization of neutralizing antibodies from a SARS-CoV-  
264 2 infected individual. *bioRxiv* 10.1101/2020.05.12.091298 (2020).
- 265 26. R. Shi *et al.*, A human neutralizing antibody targets the receptor binding site of  
266 SARS-CoV-2. *Nature* 10.1038/s41586-020-2381-y (2020).
- 267 27. T. F. Rogers *et al.*, Rapid isolation of potent SARS-CoV-2 neutralizing antibodies  
268 and protection in a small animal model. *bioRxiv* 10.1101/2020.05.11.088674  
269 (2020).
- 270 28. C. O. Barnes *et al.*, Structures of human antibodies bound to SARS-CoV-2 spike  
271 reveal common epitopes and recurrent features of antibodies. *bioRxiv*  
272 10.1101/2020.05.28.121533 (2020).
- 273 29. S. D. Boyd *et al.*, Individual variation in the germline Ig gene repertoire inferred  
274 from variable region gene rearrangements. *J Immunol* **184**, 6986-6992 (2010).
- 275 30. B. Briney, A. Inderbitzin, C. Joyce, D. R. Burton, Commonality despite  
276 exceptional diversity in the baseline human antibody repertoire. *Nature* **566**, 393-  
277 397 (2019).
- 278 31. J. Ye, N. Ma, T. L. Madden, J. M. Ostell, IgBLAST: an immunoglobulin variable  
279 domain sequence analysis tool. *Nucleic Acids Res* **41**, W34-40 (2013).
- 280 32. The amino-acid sequences of IGHV3-53 and IGHV3-66 germline genes only  
281 differ by one amino acid at residue 12. Specifically, IGHV3-53 contains Ile12,  
282 whereas IGHV3-66 contains Val12.
- 283 33. M. Zemlin *et al.*, Expressed murine and human CDR-H3 intervals of equal length  
284 exhibit distinct repertoires that differ in their amino acid composition and  
285 predicted range of structures. *J Mol Biol* **334**, 733-749 (2003).
- 286 34. L. Yu, Y. Guan, Immunologic basis for long HCDR3s in broadly neutralizing  
287 antibodies against HIV-1. *Front Immunol* **5**, 250 (2014).
- 288 35. J. G. Jardine *et al.*, Priming a broadly neutralizing antibody response to HIV-1  
289 using a germline-targeting immunogen. *Science* **349**, 156-161 (2015).
- 290 36. D. R. Burton, L. M. Walker, Rational vaccine design in the time of COVID-19. *Cell*  
291 *Host Microbe* **27**, 695-698 (2020).
- 292 37. R. K. Abbott, S. Crotty, Factors in B cell competition and immunodominance.  
293 *Immunol Rev* 10.1111/imr.12861 (2020).
- 294 38. M. J. P. van Dongen *et al.*, A small-molecule fusion inhibitor of influenza virus is  
295 orally active in mice. *Science* **363**, eaar6221 (2019).

296 39. E. Krissinel, K. Henrick, Inference of macromolecular assemblies from crystalline  
297 state. *J Mol Biol* **372**, 774-797 (2007).  
298

## 299 **ACKNOWLEDGEMENTS**

300 We thank Robyn Stanfield for assistance in data collection and Bryan Briney for naïve  
301 antibody germline analysis. We are grateful to the staff of Stanford Synchrotron  
302 Radiation Laboratory (SSRL) Beamline 12-1 for assistance. This work was supported by  
303 NIH K99 AI139445 (N.C.W.), the Bill and Melinda Gates Foundation OPP1170236  
304 (I.A.W. and D.R.B.), NIH CHAVD (UM1 AI44462 to I.A.W., D.S. and D.R.B.), and the  
305 IAVI Neutralizing Antibody Center. Use of the SSRL, SLAC National Accelerator  
306 Laboratory, is supported by the U.S. Department of Energy, Office of Science, Office of  
307 Basic Energy Sciences under Contract No. DE-AC02-76SF00515. The SSRL Structural  
308 Molecular Biology Program is supported by the DOE Office of Biological and  
309 Environmental Research, and by the National Institutes of Health, National Institute of  
310 General Medical Sciences (including P41GM103393).

311

## 312 **AUTHOR CONTRIBUTIONS**

313 M.Y., H.L., N.C.W., F.Z., D.H., T.F.R., E.L., D.S, J.G.J., D.R.B. and I.A.W. conceived  
314 and designed the study. M.Y., H.L., N.C.W., C.C.D.L., W.Y. and Y.H. expressed and  
315 purified the proteins. M.Y. and C.C.D.L. performed biolayer interferometry binding  
316 assays. M.Y., H.L., N.C.W., X.Z. and H.T. performed the crystallization and X-ray data  
317 collection. M.Y. and X.Z. determined and refined the X-ray structures. M.Y., H.L.,  
318 N.C.W., C.C.D.L. and X.Z. analyzed the data. M.Y., H.L., N.C.W. and I.A.W. wrote the  
319 paper and all authors reviewed and/or edited the paper.

320

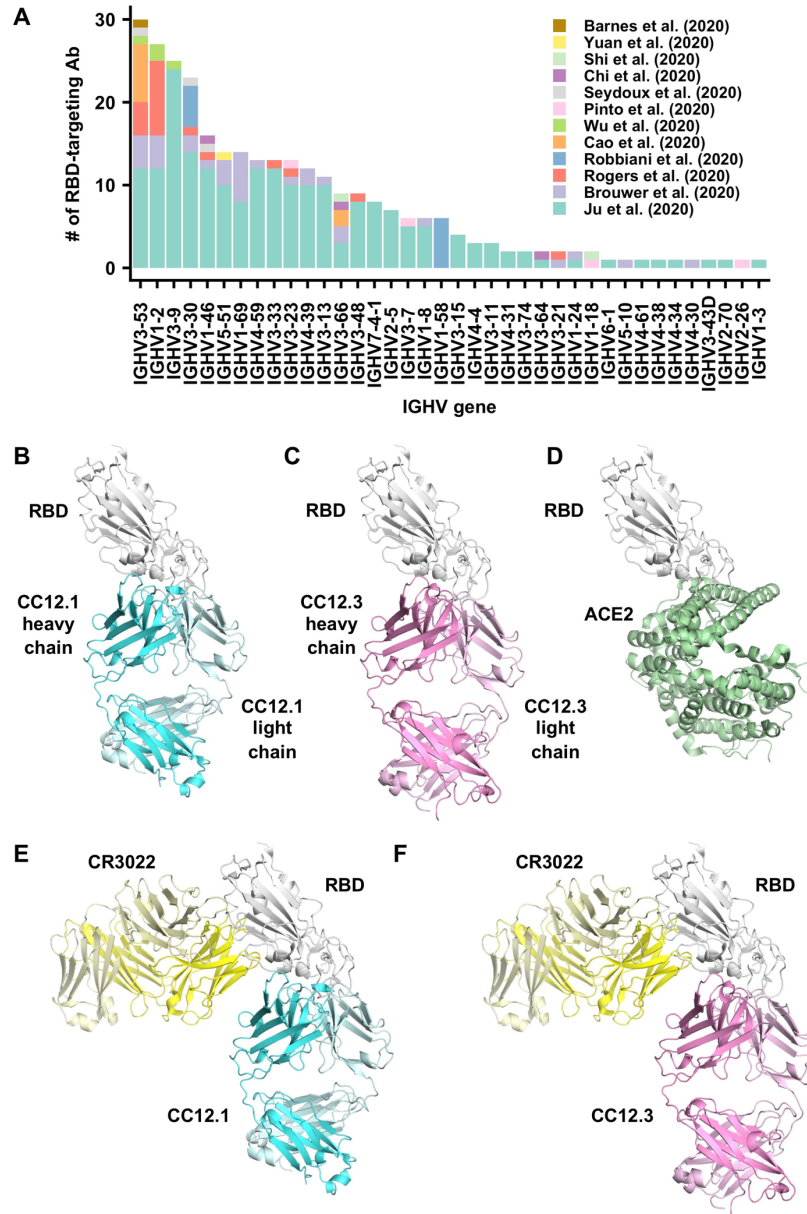

321

322 **Figure 1. Structures of two IGHV3-53 antibodies. (A)** The distribution of IGHV gene  
 323 usage is shown for a total of 294 RBD-targeting antibodies (17-28). **(B-F)** Crystal  
 324 structures of **(B)** CC12.1 in complex with SARS-CoV-2 RBD, **(C)** CC12.3 with SARS-  
 325 CoV-2 RBD, **(D)** human ACE2 with SARS-CoV-2 RBD (PDB 6M0J) (12), **(E)** SARS-  
 326 CoV-2 RBD with CC12.1 and CR3022, and **(F)** SARS-CoV-2 RBD with CC12.3 and  
 327 CR3022.

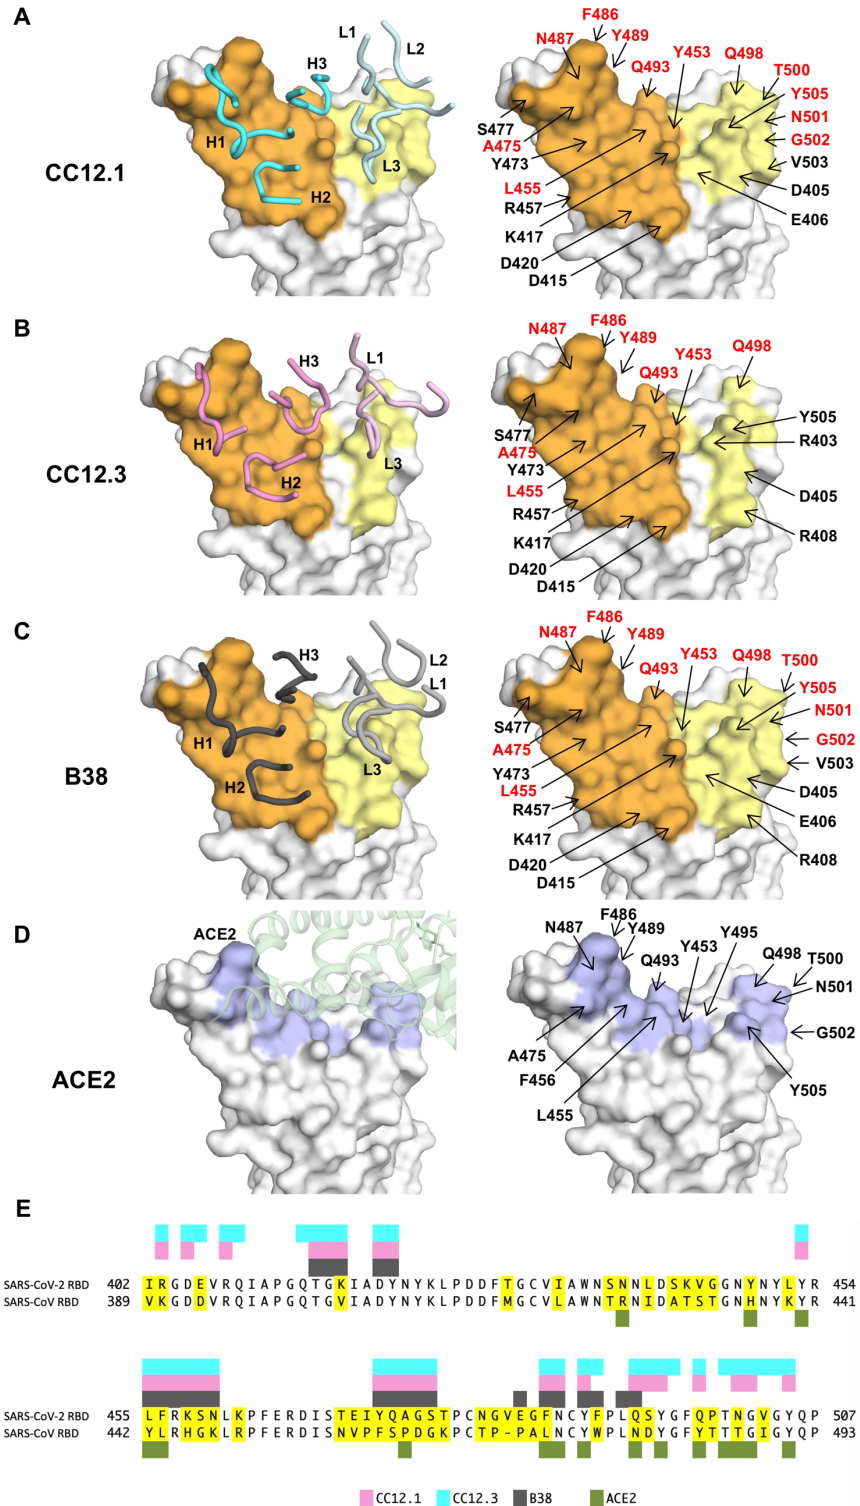

328

329 **Figure 2. Epitopes of IGHV35-3 antibodies. (A-C) Epitopes of (A) CC12.1, (B)**

330 **CC12.3, and (C) B38 (PDB 7BZ5) (23). Epitope residues contacting the heavy chain are**

331 in orange and the light chain are in yellow. On the left panels, CDR loops are labeled. On  
332 the right panels, epitope residues are labeled. For clarity, only representative epitope  
333 residues are labeled. Epitope residues that are also involved in ACE2 binding are in red.  
334 **(D)** ACE2-binding residues are shown in blue. On the left panel, ACE2 is shown in green  
335 with in semi-transparent representation. On the right panel, ACE2-binding residues are  
336 labeled. A total of 16 residues are used for ACE2 binding (12), but only 13 are labeled  
337 here since the other three are at the back of the structure in this view and do not interact  
338 with the antibodies of interest. **(E)** Epitope residues for CC12.1, CC12.3, and B38 were  
339 identified by PISA (39) and annotated on the SARS-CoV-2 RBD sequence, which is  
340 aligned to the SARS-CoV RBD sequence with non-conserved residues highlighted. The  
341 16 ACE2-binding residues were as described previously (12).  
342

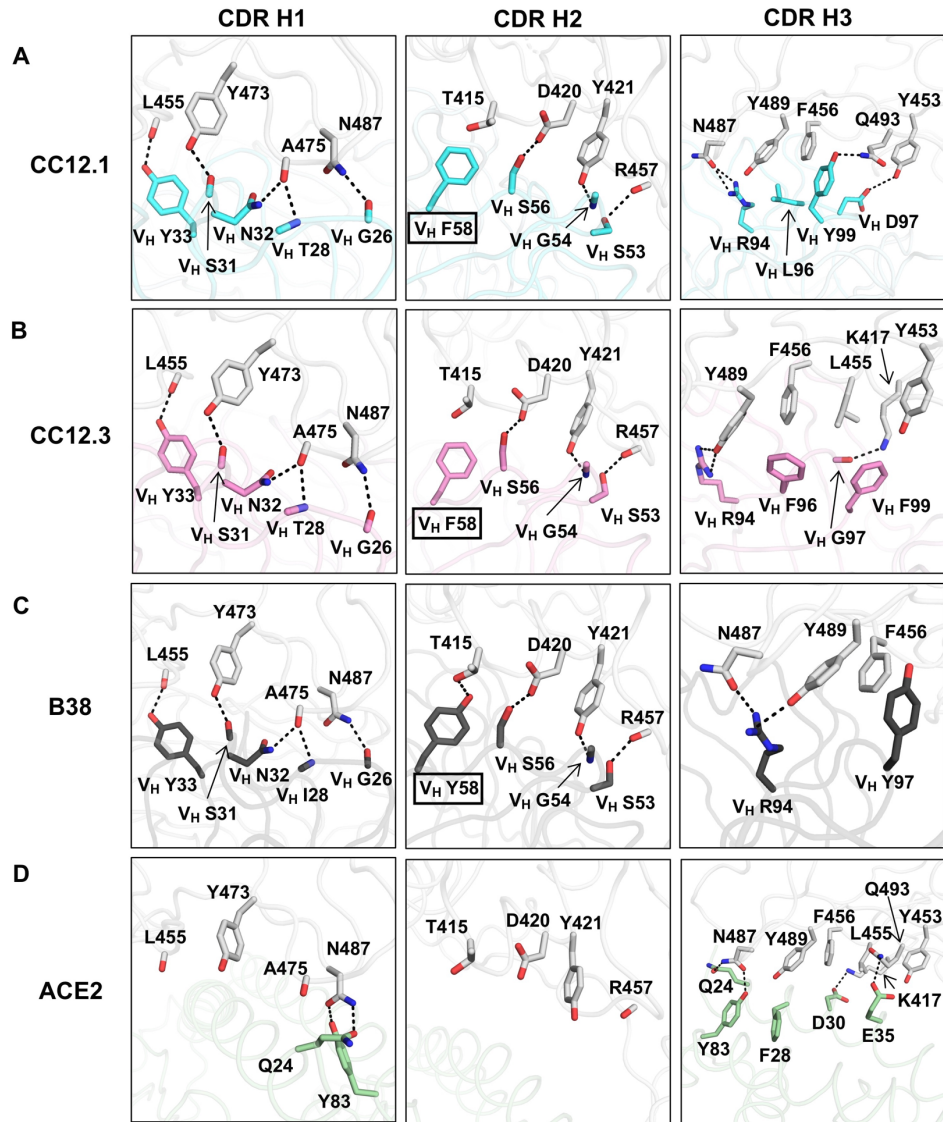

343

344 **Figure 3. Interactions between the RBD and the heavy chain CDR loops. (A-C)**

345 Highly similar interaction modes between SARS-CoV-2 RBD and the antibody CDR H1

346 and H2 loops, but not the H3 loop are observed for in **(A)** CC12.1, **(B)** CC12.3, and **(C)**

347 B38 (PDB 7BZ5) (23). The RBD is in white and antibody residues are in cyan, pink, and

348 dark gray, respectively. Oxygen atoms are in red, and nitrogen atoms in blue. Hydrogen

349 bonds are represented by dashed lines. **(D)** The interaction between ACE2 (green) and

350 residues of the RBD (PDB 6M0J) (12) that are shown in **(A-C)**.

351



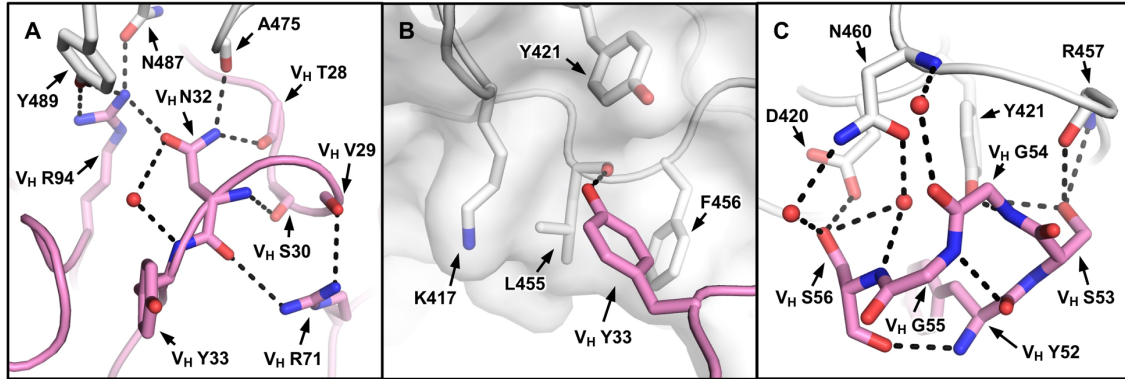

352

353 **Figure 4. Two IGHV3-53 germline-encoded motifs. (A)** The extensive hydrogen bond  
354 network that involves V<sub>H</sub> N32 of the NY motif in CDR H1 is illustrated. **(B)** The  
355 hydrophobic cage interaction between the RBD and V<sub>H</sub> Y33 of the NY motif in CDR H1 is  
356 shown. **(C)** The hydrogen bond network that involves the SGGS motif in CDR H2 is  
357 highlighted. CC12.3 is shown because its structure is at higher resolution than CC12.1.

358

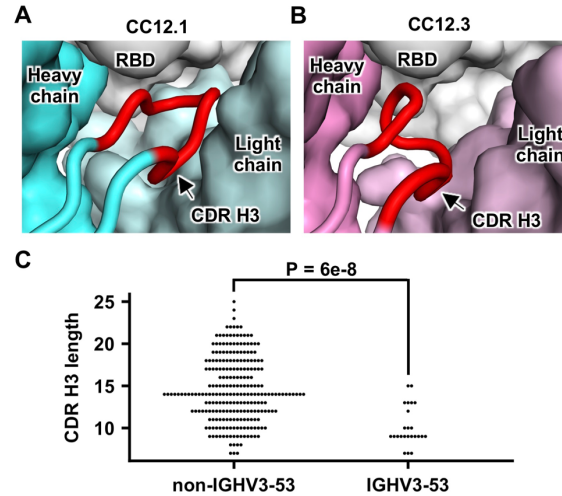

359

360 **Figure 5. Constraints on CDR H3 length.** (A) The heavy and light chains of CC12.1  
361 (cyan), as well as the RBD (white) are shown in surface representation, with CDR H3  
362 (red) highlighted in cartoon representation. (B) Same as panel A, except that CC12.3  
363 (pink) is shown. (C) The lengths of CDR H3 in RBD-targeting antibodies that were  
364 previously isolated (17-28) are analyzed. The distribution of CDR H3 lengths in RBD-  
365 targeting IGHV3-53 antibodies and those in non-IGHV3-53-encoded antibodies are  
366 compared. A Mann-Whitney U test was performed to compute the p-value.

367

## 368 **MATERIALS AND METHODS**

### 369 **Expression and purification of SARS-CoV-2 RBD**

370 The receptor-binding domain (RBD) (residues 319-541) of the SARS-CoV-2 spike (S)  
371 protein (GenBank: QHD43416.1) was cloned into a customized pFastBac vector (40),  
372 and fused with an N-terminal gp67 signal peptide and C-terminal His<sub>6</sub> tag (17). A  
373 recombinant bacmid DNA was generated using the Bac-to-Bac system (Life  
374 Technologies). Baculovirus was generated by transfecting purified bacmid DNA into Sf9  
375 cells using FuGENE HD (Promega), and subsequently used to infect suspension  
376 cultures of High Five cells (Life Technologies) at an MOI of 5 to 10. Infected High Five  
377 cells were incubated at 28 °C with shaking at 110 r.p.m. for 72 h for protein expression.  
378 The supernatant was then concentrated using a 10 kDa MW cutoff Centrimate cassette  
379 (Pall Corporation). The RBD protein was purified by Ni-NTA, followed by size exclusion  
380 chromatography, and buffer exchanged into 20 mM Tris-HCl pH 7.4 and 150 mM NaCl.

381

### 382 **Expression and purification of Fabs**

383 For CC12.1 and CC12.3, the heavy and light chains were cloned into pHCMV3. The  
384 plasmids were transiently co-transfected into ExpiCHO cells at a ratio of 2:1 (HC:LC)  
385 using ExpiFectamine™ CHO Reagent (Thermo Fisher Scientific) according to the  
386 manufacturer's instructions. The supernatant was collected at 10 days post-transfection.  
387 The Fabs were purified with a CaptureSelect™ CH1-XL Affinity Matrix (Thermo Fisher  
388 Scientific) followed by size exclusion chromatography. CR3022 was expressed and  
389 purified as described previously (17).

390

### 391 **Expression and purification of ACE2**

392 The N-terminal peptidase domain of human ACE2 (residues 19 to 615, GenBank:  
393 BAB40370.1) was cloned into pHCMV3 vector, and fused with a C-terminal Fc tag. The

394 plasmids were transiently transfected into Expi293F cells using ExpiFectamine™ 293  
395 Reagent (Thermo Fisher Scientific) according to the manufacturer's instructions. The  
396 supernatant was collected at 7 days post-transfection. Fc-tagged ACE2 protein was then  
397 purified with a Protein A column (GE Healthcare) followed by size exclusion  
398 chromatography.

399

#### 400 **Crystallization and structural determination**

401 CC12.1/RBD, CC12.3/RBD, CC12.1/CR3022/RBD, and CC12.3/CR3022/RBD  
402 complexes were formed by mixing each of the protein components at an equimolar ratio  
403 and incubated overnight at 4°C. Each complex was adjusted to 13 mg/ml and screened  
404 for crystallization using the 384 conditions of the JCSG Core Suite (Qiagen) and ProPlex  
405 screen (Molecular Dimensions) on either our custom-designed robotic CrystalMation  
406 system (Rigaku) or an Oryx8 (Douglas Instruments) at Scripps Research. Crystallization  
407 trials were set-up by the vapor diffusion method in sitting drops containing 0.1 µl of  
408 protein and 0.1 µl of reservoir solution. Diffraction-quality crystals were obtained in the  
409 following conditions:

410

411 CC12.1/RBD complex (13 mg/ml): 0.1M sodium citrate pH 5.5 and 15% (w/v)  
412 polyethylene glycol 6000 at 20°C

413 CC12.3/RBD complex (13 mg/mL): 0.1 M sodium phosphate pH 6.5 and 12% (w/v)  
414 polyethylene glycol 8000 at 20°C

415 CC12.1/RBD/CR3022 complex (13 mg/mL): 20% PEG-3000, 0.2 M sodium chloride, 0.1  
416 M HEPES pH 7.5 at 20°C

417 CC12.3/RBD/CR3022 complex (13 mg/mL): 0.1M Tris pH 8, 15% ethylene glycol, 1M  
418 lithium chloride, 10% PEG 6000 at 20°C

419

420 Of note, these four complexes crystallized in a broad range of pHs. All crystals appeared  
421 on day 3 and were harvested on day 7. Before flash cooling in liquid nitrogen for X-ray  
422 diffraction studies, crystals were equilibrated in reservoir solution supplemented the  
423 following cryoprotectants:

424

425 CC12.1/RBD complex: 20% glycerol

426 CC12.3/RBD complex: 20% glycerol

427 CC12.1/RBD/CR3022 complex: 10% ethylene glycol

428 CC12.3/RBD/CR3022 complex: none were required

429

430 Diffraction data were collected at cryogenic temperature (100 K) at Stanford Synchrotron  
431 Radiation Lightsource (SSRL) on the new Scripps/Stanford beamline 12-1 with a beam  
432 wavelength of 0.97946 Å, and processed with HKL2000 (41). Structures were solved by  
433 molecular replacement using PHASER (42) with PDB 6YLA (43), 4TSA, and 4ZD3 (44).  
434 Iterative model building and refinement were carried out in COOT (45) and PHENIX (46),  
435 respectively. Epitope and paratope residues, as well as their interactions, were identified  
436 by accessing PISA at the European Bioinformatics Institute  
437 ([http://www.ebi.ac.uk/pdbe/prot\\_int/pistart.html](http://www.ebi.ac.uk/pdbe/prot_int/pistart.html)) (39).

438

#### 439 **Biolayer interferometry binding assay**

440 Antibody binding and competition assays were performed by biolayer interferometry  
441 (BLI) using an Octet Red instrument (FortéBio) as described previously (47), with Ni-  
442 NTA biosensors. There were five steps in the assay: 1) baseline: 60 s with 1x kinetics  
443 buffer; 2) loading: 180 s with 20 µg/mL of 6x His-tagged SARS-CoV-2 RBD proteins; 3)  
444 baseline: 135 s with 1x kinetics buffer; 4) association: 240 s with serial diluted  
445 concentrations of CC12.1 Fab or CC12.3 Fab; and 5) dissociation: 240 s with 1x kinetics

446 buffer. For  $K_d$  estimation, a 1:1 binding model was used.

447

448 For competition assays, CC12.1 Fab, CC12.3 Fab, CR3022 Fab, and human ACE2-Fc  
449 were all diluted to 250 nM. Ni-NTA biosensors were used. In brief, the assay has five  
450 steps: 1) baseline: 60 s with 1x kinetics buffer; 2) loading: 120 s with 20  $\mu\text{g/mL}$ , 6x His-  
451 tagged SARS-CoV-2 RBD proteins; 3) baseline: 120 s with 1x kinetics buffer; 4) first  
452 association: 180 s with CC12.1 Fab, CC12.3 Fab or CR3022 Fab; and 5) second  
453 association: 180 s with CC12.1 Fab, CC12.3 Fab, CR3022 Fab, or human ACE2-Fc or  
454 disassociation with 1x kinetics buffer for each first association.

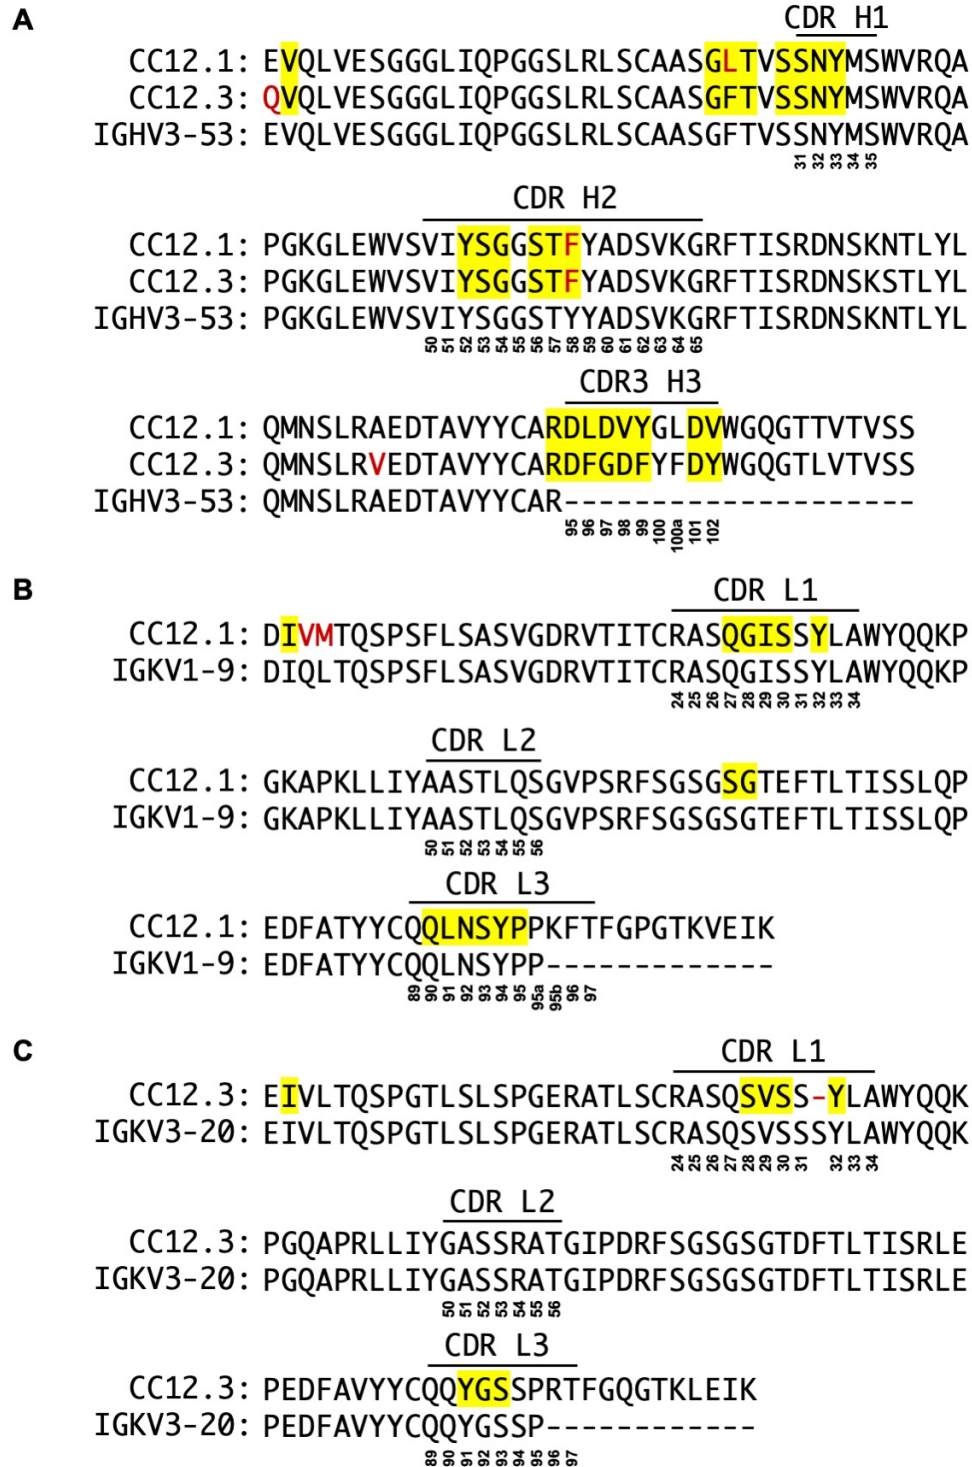

455

456 **Fig. S1. Comparison of CC12.1 and CC12.3 sequence to the IGHV3-53 germline**

457 **sequence. (A)** Alignment of the heavy chain variable domain sequences of CC12.1 and

458 CC12.3 with the germline IGHV3-53 sequence **(B)** Alignment of the light-chain variable  
459 domain sequence of CC12.1 with the germline IGKV1-9 sequence. **(C)** Alignment of the  
460 light-chain variable domain sequence of CC12.3 with the germline IGKV3-20 sequence.  
461 The regions that correspond to CDR H1, H2, H3, L1, L2, and L3 are indicated. Residues  
462 that differ from the germline are highlighted in red. Residue positions in the CDRs are  
463 labeled according to the Kabat numbering scheme. Residues that interact with the RBD  
464 are highlighted in yellow.  
465



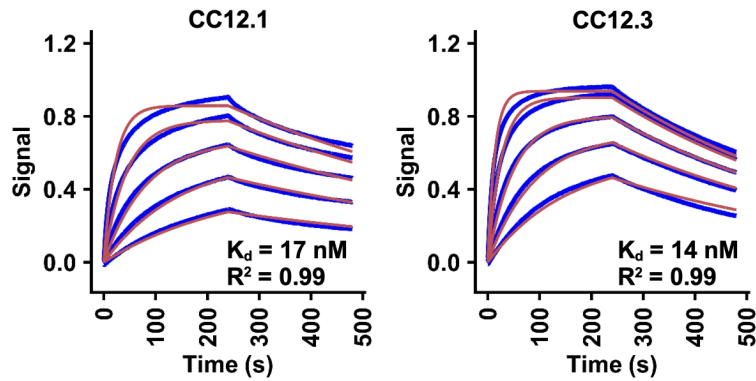

466

467 **Fig. S2. Sensorgrams for binding of CC12.1 and CC12.3 Fabs to SARS-CoV-2 RBD.**

468 Binding kinetics of CC12.1 and CC12.3 Fab against SARS-CoV-2 RBD were measured

469 by biolayer interferometry (BLI). Y-axis represents the response. Blue lines represent the

470 response curves and red lines represent the 1:1 binding model. Binding kinetics were

471 measured for five concentrations of Fab at 2-fold dilution ranging from 500 nM to 31.25

472 nM. The  $K_d$  and  $R^2$  of the fitting are indicated.

473

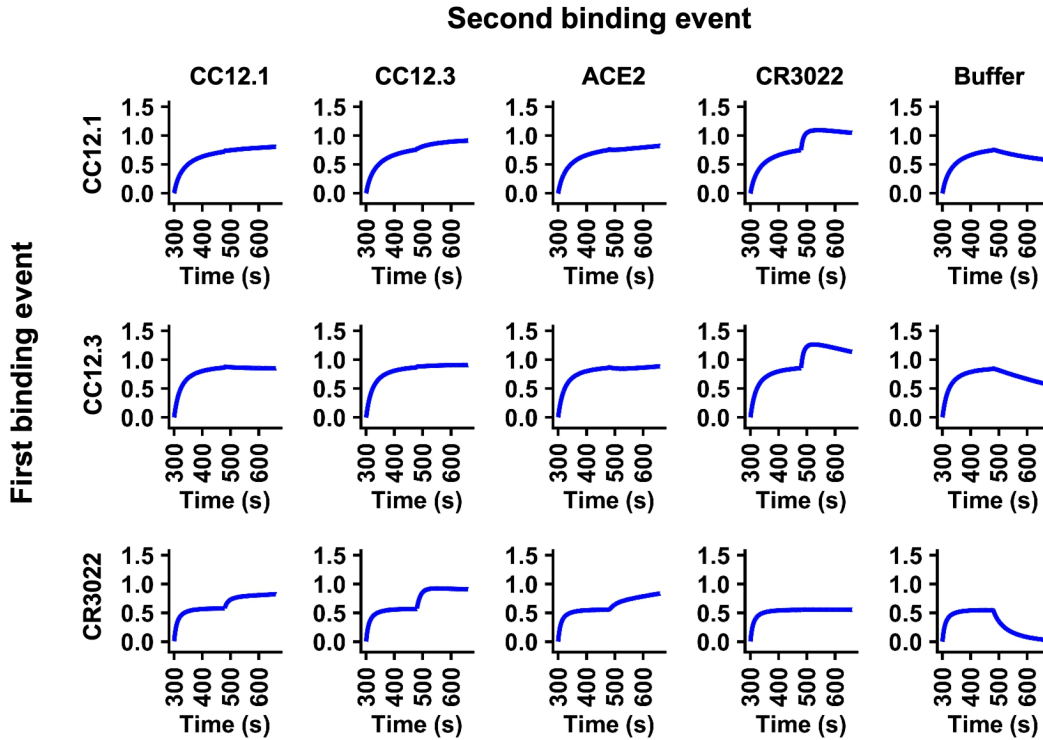

474

475 **Fig. S3. Competition assay between different Fabs and ACE2.** Competition between  
476 CC12.1, CC12.3, CR3022, and ACE2 was measured by biolayer interferometry (BLI). Y-  
477 axis represents the response. The biosensor was first loaded with SARS-CoV-2 RBD,  
478 followed by two binding events: 1) CC12.1, CC12.3, or CR3022, and 2) CC12.1,  
479 CC12.3, or CR3022, ACE2, and buffer (negative control). A period of 180 s was used for  
480 each of the binding events. A further increase in signal during the second binding event  
481 (starting at 480 s time point) indicates lack of competition with the first ligand.

482

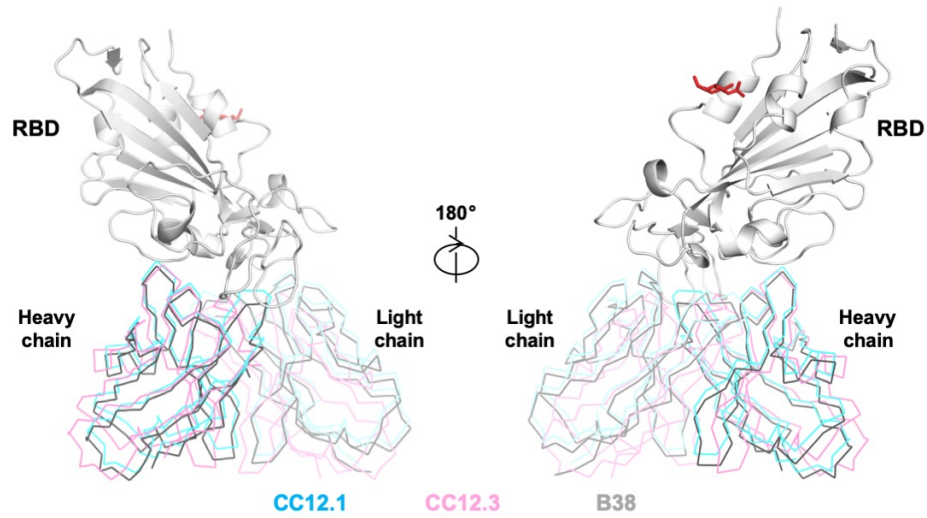

483

484 **Fig. S4. Structural comparison of the binding modes among IGHV3-53 antibodies.**

485 The binding modes of CC12.1 (cyan), CC12.3 (pink), and B38 (gray) to SARS-CoV-2

486 (white) are compared. B38 in complex with SARS-CoV-2 RBD was from PDB 7BZ5 (23).

487 The N-glycan observed at SARS-CoV-2 RBD N343 is shown in red.

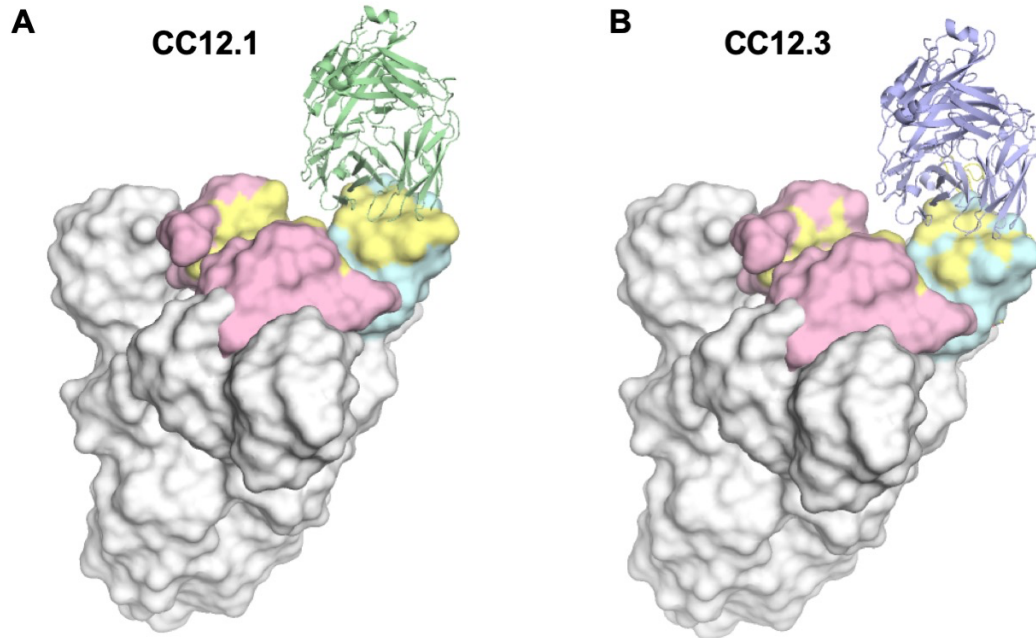

488

489 **Fig. S5. Modelling the binding of CC12.1 and CC12.3 on the homotrimeric spike (S)**  
490 **protein.** The S trimer is shown with one RBD in the up conformation (cyan) and two  
491 RBDs in the down conformation (pink). The CC12.1 and CC12.3 epitopes are shown in  
492 yellow. **(A)** Model of the binding of CC12.1 (green) to the RBD up conformation. **(B)**  
493 Model of the binding of CC12.3 (blue). PDB 6VSB is used in the modeling (48). The  
494 complete epitopes of CC12.1 and CC12.3 are accessible only when the RBD is in the  
495 up, but not the down, conformation.

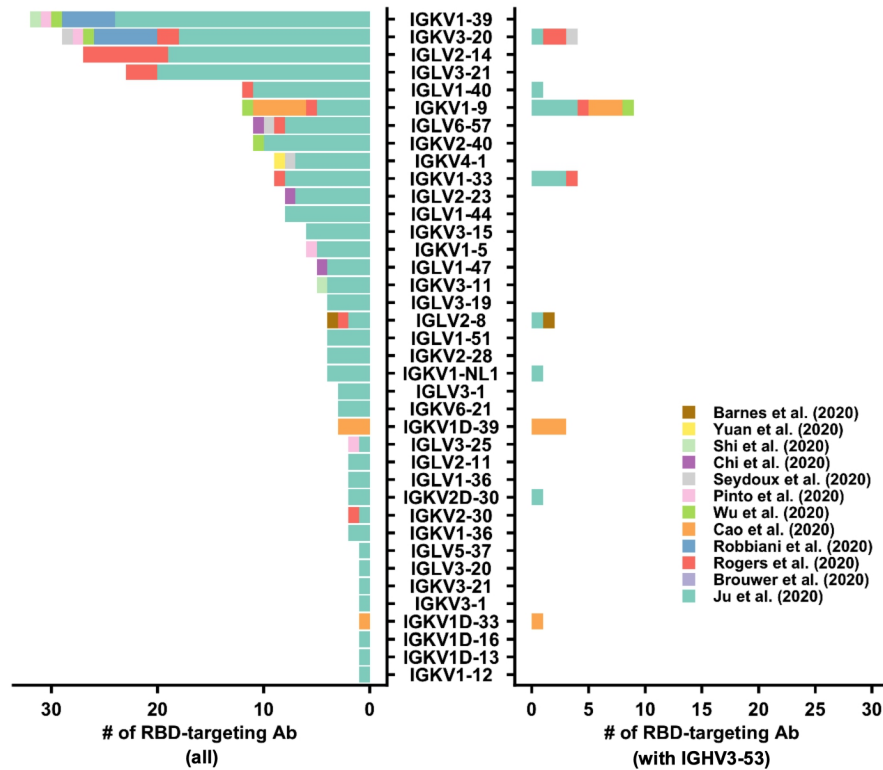

496

497 **Fig. S6. Light-chain germline gene use in SARS-CoV-2 RBD-targeting antibodies.**

498 The distribution of light-chain germline gene use of SARS-CoV-2 RBD-targeting

499 antibodies that have been recently isolated (17-28) is shown on the left. The distribution

500 of light-chain germline gene use in antibodies that target SARS-CoV-2 RBD to the

501 subset of antibodies that pair with IGHV3-53 is shown on the right.

502

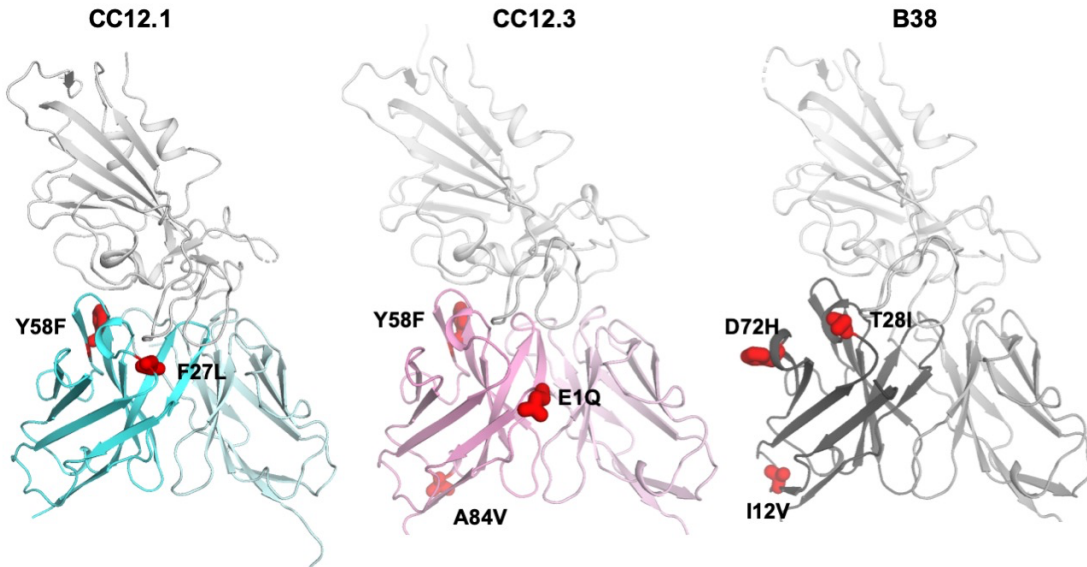

503

504 **Fig. S7. Locations of heavy chain somatic mutations.** Somatic mutations on the  
505 heavy chains of CC12.1, CC12.3, and B38 are labeled and shown in red on the  
506 structure. Somatic mutations contribute minimally to the antibody binding interactions.

507

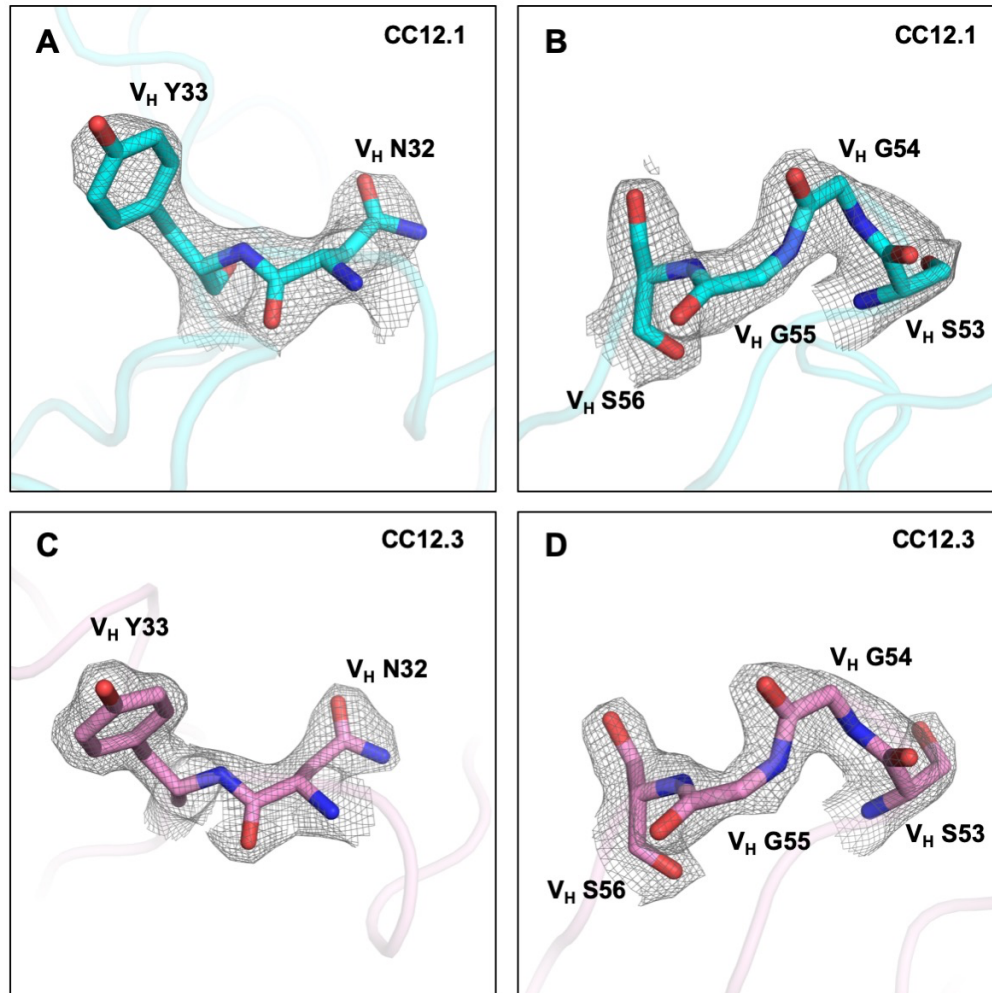

508

509 **Fig. S8. Electron density maps for IGHV3-53-encoded paratope regions of CC12.1**

510 **and CC12.3. (A-B) Final 2Fo-Fc electron density maps for the IGHV3-53-encoded**

511 **paratope regions around V<sub>H</sub> N32 and Y33 (CDR H1) and V<sub>H</sub> S53 to S56 (CDR H2) of**

512 **CC12.1, both contoured at 1.2  $\sigma$ . (C-D) Final 2Fo-Fc electron density maps for IGHV3-**

513 **53-encoded paratope regions around V<sub>H</sub> N32 and Y33 and V<sub>H</sub> S53 to S56 of CC12.3,**

514 **both contoured at 1.8  $\sigma$ .**

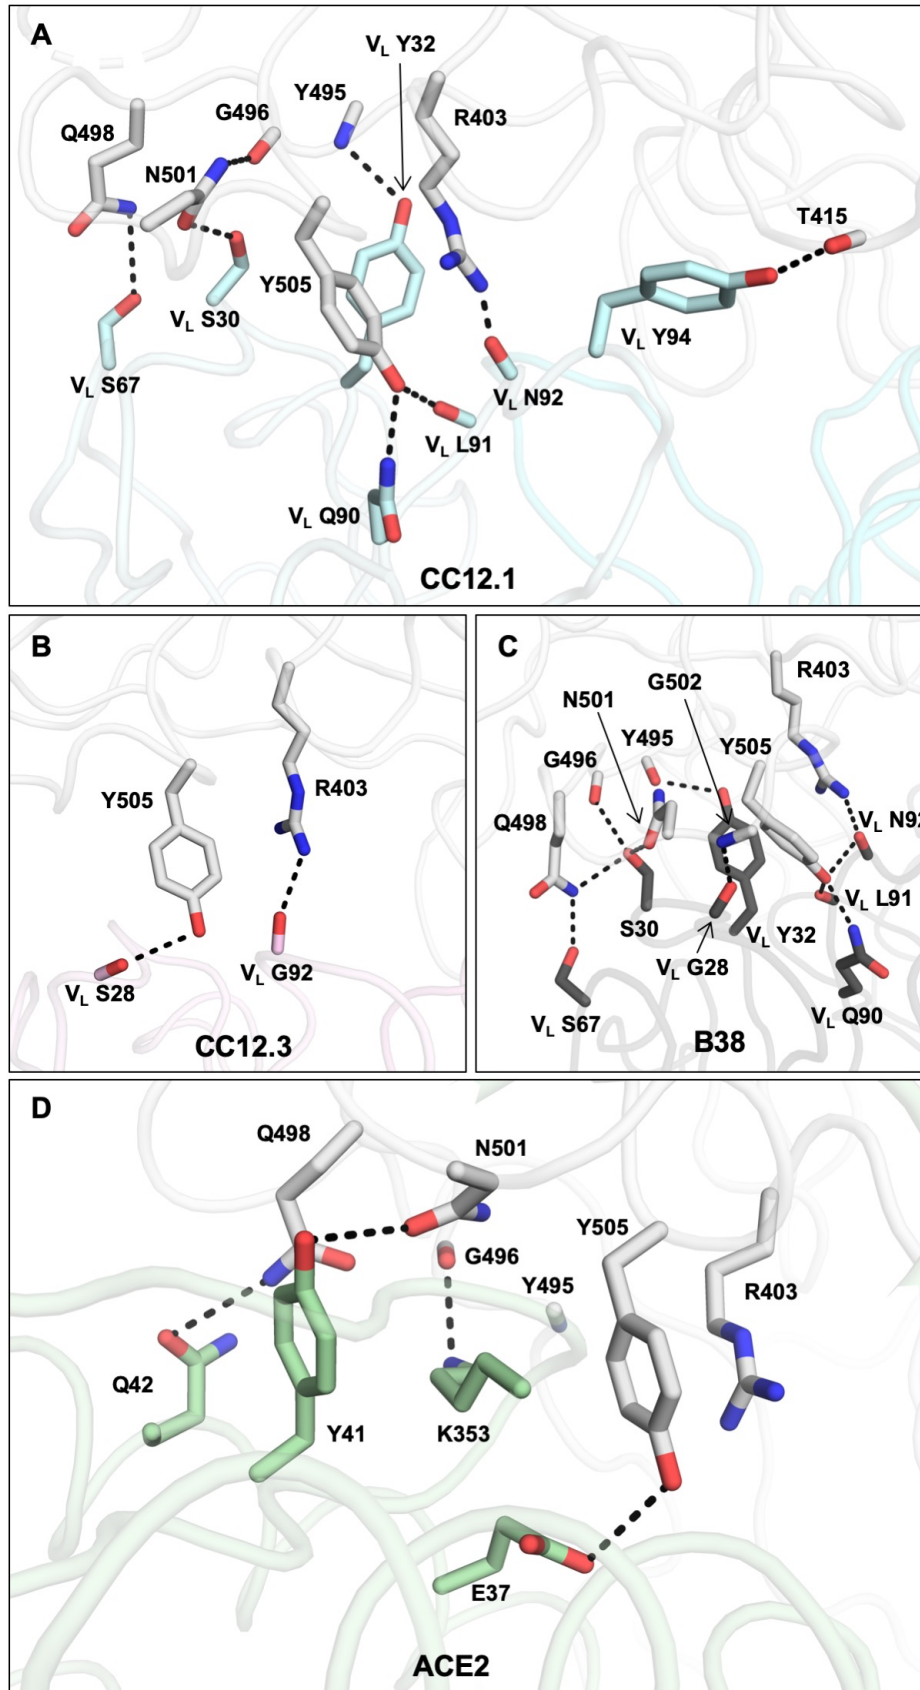



516 **Fig. S9. Interactions between the light chain and the RBD. (A-C)** Representative  
517 interactions between SARS-CoV-2 RBD and the light chain in **(A)** CC12.1, **(B)** CC12.3,  
518 and **(C)** B38 (PDB 7BZ5) (23) are shown. RBD is in white. Oxygen atoms are in red.  
519 Nitrogen atoms are in blue. Hydrogen bonds are represented by dashed lines. The light  
520 chains from both CC12.1 and B38 form an extensive hydrogen bond network with the  
521 RBD, whereas the interaction between the light chain of CC12.3 and the RBD is  
522 minimal. **(D)** The interaction between ACE2 and RBD residues (PDB 6M0J) (12) that are  
523 shown in **(A-C)**. None of the interactions between the light chain and RBD mimic those  
524 between ACE2 and RBD.  
525

526

**Table S1. X-ray data collection and refinement statistics**

| <b>Data collection</b>                                               |                       |                       |                                   |                                   |
|----------------------------------------------------------------------|-----------------------|-----------------------|-----------------------------------|-----------------------------------|
|                                                                      | CC12.1 + RBD          | CC12.3 + RBD          | CC12.1 + RBD + CR3022             | CC12.3 + RBD + CR3022             |
| Beamline                                                             | SSRL 12-1             | SSRL 12-1             | SSRL 12-1                         | SSRL 12-1                         |
| Wavelength (Å)                                                       | 0.97946               | 0.97946               | 0.97946                           | 0.97946                           |
| Space group                                                          | P 1 2 <sub>1</sub> 1  | P 1 2 <sub>1</sub> 1  | P 4 <sub>1</sub> 2 <sub>1</sub> 2 | P 4 <sub>1</sub> 2 <sub>1</sub> 2 |
| Unit cell parameters                                                 |                       |                       |                                   |                                   |
| a, b, c (Å)                                                          | 80.7, 143.5, 81.5     | 56.1, 105.6, 165.9    | 109.8, 109.8, 235.7               | 110.9, 110.9, 228.5               |
| α, β, γ (°)                                                          | 90, 118.7, 90         | 90, 92.8, 90          | 90, 90, 90                        | 90, 90, 90                        |
| Resolution (Å) <sup>a</sup>                                          | 50.0-3.20 (3.27-3.20) | 50.0-2.33 (2.38-2.33) | 50.0-2.70 (2.76-2.70)             | 50-2.90 (2.97-2.90)               |
| Unique reflections <sup>a</sup>                                      | 25,802 (1,234)        | 78,783 (7,298)        | 40,463 (3,945)                    | 32,870 (3,160)                    |
| Redundancy <sup>a</sup>                                              | 1.5 (1.3)             | 2.4 (2.1)             | 5.7 (3.7)                         | 13.6 (12.6)                       |
| Completeness (%) <sup>a</sup>                                        | 88.3 (42.5)           | 97.6 (98.8)           | 99.9 (100.0)                      | 99.9 (100.0)                      |
| <I/σ <sub>I</sub> > <sup>a</sup>                                     | 7.4 (1.1)             | 10.2 (1.0)            | 16.2 (1.2)                        | 20.1 (1.1)                        |
| R <sub>sym</sub> <sup>b</sup> (%) <sup>a</sup>                       | 16.3 (57.4)           | 14.3 (95.4)           | 16.7 (>100)                       | 12.9 (>100)                       |
| R <sub>pim</sub> <sup>b</sup> (%) <sup>a</sup>                       | 11.6 (45.0)           | 7.0 (50.8)            | 5.3 (41.6)                        | 3.6 (46.7)                        |
| CC <sub>1/2</sub> <sup>c</sup> (%) <sup>a</sup>                      | 96.6 (61.7)           | 98.7 (50.8)           | 100.6 (60.3)                      | 99.6 (65.2)                       |
| <b>Refinement statistics</b>                                         |                       |                       |                                   |                                   |
| Resolution (Å)                                                       | 39.7-3.11             | 41.7-2.34             | 41.6-2.70                         | 42.3-2.88                         |
| Reflections (work)                                                   | 25,776                | 78,774                | 40,462                            | 32,868                            |
| Reflections (test)                                                   | 1,289                 | 3,800                 | 1,963                             | 1,654                             |
| R <sub>cryst</sub> <sup>d</sup> / R <sub>free</sub> <sup>e</sup> (%) | 21.3/26.7             | 18.4/21.9             | 17.7/22.4                         | 21.9 (25.9)                       |
| No. of atoms                                                         |                       |                       |                                   |                                   |
| Macromolecules                                                       | 9,580                 | 9,632                 | 8,148                             | 8,152                             |
| Glycans                                                              | 28                    | 28                    | 28                                | 39                                |
| Solvent                                                              | 0                     | 649                   | 170                               | 0                                 |
| Average B-value (Å <sup>2</sup> )                                    |                       |                       |                                   |                                   |
| Macromolecules                                                       | 70                    | 39                    | 49                                | 76                                |
| Glycans                                                              | 98                    | 65                    | 72                                | 94                                |
| Solvent                                                              | -                     | 41                    | 43                                | -                                 |
| Wilson B-value (Å <sup>2</sup> )                                     | 70                    | 35                    | 53                                | 80                                |
| <b>RMSD from ideal geometry</b>                                      |                       |                       |                                   |                                   |
| Bond length (Å)                                                      | 0.003                 | 0.004                 | 0.003                             | 0.003                             |
| Bond angle (°)                                                       | 0.68                  | 0.78                  | 0.70                              | 0.78                              |
| <b>Ramachandran statistics (%)</b>                                   |                       |                       |                                   |                                   |
| Favored                                                              | 94.7                  | 96.5                  | 96.8                              | 95.9                              |
| Outliers                                                             | 0.16                  | 0.24                  | 0.10                              | 0.19                              |
| <b>PDB code</b>                                                      |                       |                       |                                   |                                   |
|                                                                      | 6XC2                  | 6XC4                  | 6XC3                              | 6XC7                              |

527  
528  
529  
530  
531  
532  
533

<sup>a</sup> Numbers in parentheses refer to the highest resolution shell.

<sup>b</sup>  $R_{sym} = \sum_{hkl} \sum_i |I_{hkl,i} - \langle I_{hkl} \rangle| / \sum_{hkl} \sum_i I_{hkl,i}$  and  $R_{pim} = \sum_{hkl} (1/(n-1))^{1/2} \sum_i |I_{hkl,i} - \langle I_{hkl} \rangle| / \sum_{hkl} \sum_i I_{hkl,i}$ , where  $I_{hkl,i}$  is the scaled intensity of the  $i^{\text{th}}$  measurement of reflection  $h, k, l$ ,  $\langle I_{hkl} \rangle$  is the average intensity for that reflection, and  $n$  is the redundancy.

<sup>c</sup>  $CC_{1/2}$  = Pearson correlation coefficient between two random half datasets.

<sup>d</sup>  $R_{cryst} = \sum_{hkl} |F_o - F_c| / \sum_{hkl} |F_o| \times 100$ , where  $F_o$  and  $F_c$  are the observed and calculated structure factors, respectively.

<sup>e</sup>  $R_{free}$  was calculated as for  $R_{cryst}$ , but on a test set comprising 5% of the data excluded from refinement.

534

**Table S2. A list of previously reported SARS-CoV-2 RBD-targeting antibodies.**

| Antibody name | Heavy chain | Light chain | CDR H3 length | Reference           |
|---------------|-------------|-------------|---------------|---------------------|
| S124          | IGHV2-26    | IGKV1-39    | 15            | Pinto et al. (2020) |
| S309          | IGHV1-18    | IGKV3-20    | 18            | Pinto et al. (2020) |
| S315          | IGHV3-7     | IGLV3-25    | 15            | Pinto et al. (2020) |
| S303          | IGHV3-23    | IGKV1-5     | 15            | Pinto et al. (2020) |
| P1A-1C7       | IGHV1-46    | IGKV1-39    | 13            | Ju et al. (2020)    |
| P1A-1C10      | IGHV1-69    | IGKV1-5     | 14            | Ju et al. (2020)    |
| P1A-1C11      | IGHV1-69    | IGKV1-5     | 14            | Ju et al. (2020)    |
| P1A-1C6       | IGHV3-13    | IGKV1-39    | 17            | Ju et al. (2020)    |
| P1A-1D3       | IGHV3-13    | IGKV1-39    | 16            | Ju et al. (2020)    |
| P1A-1C2       | IGHV3-23    | IGKV1-36    | 8             | Ju et al. (2020)    |
| P1A-1B2       | IGHV3-30    | IGLV2-14    | 10            | Ju et al. (2020)    |
| P1A-1C1       | IGHV3-33    | IGKV1D-13   | 15            | Ju et al. (2020)    |
| P1A-1D1       | IGHV3-53    | IGLV2-8     | 10            | Ju et al. (2020)    |
| P1A-1D5       | IGHV3-53    | IGKV1-33    | 13            | Ju et al. (2020)    |
| P1A-1D6       | IGHV3-53    | IGKV1-33    | 13            | Ju et al. (2020)    |
| P2A-1A10      | IGHV1-2     | IGKV2-40    | 17            | Ju et al. (2020)    |
| P2B-1A4       | IGHV1-2     | IGKV2-40    | 17            | Ju et al. (2020)    |
| P2B-1B2       | IGHV1-2     | IGKV2-40    | 17            | Ju et al. (2020)    |
| P2B-2G1       | IGHV1-2     | IGKV2-40    | 17            | Ju et al. (2020)    |
| P2B-2G12      | IGHV1-2     | IGKV2-40    | 17            | Ju et al. (2020)    |
| P2C-1A10      | IGHV1-2     | IGKV2-40    | 17            | Ju et al. (2020)    |
| P2C-1B10      | IGHV1-2     | IGKV2-40    | 17            | Ju et al. (2020)    |
| P2C-1D6       | IGHV1-2     | IGKV2-40    | 17            | Ju et al. (2020)    |
| P2C-1D12      | IGHV1-2     | IGKV2-40    | 17            | Ju et al. (2020)    |
| P2C-1F10      | IGHV1-2     | IGKV2-40    | 17            | Ju et al. (2020)    |
| P2B-1F8       | IGHV1-2     | IGKV3-20    | 12            | Ju et al. (2020)    |
| P2B-2G9       | IGHV1-2     | IGKV3-20    | 12            | Ju et al. (2020)    |
| P2B-1C3       | IGHV1-46    | IGKV1-5     | 13            | Ju et al. (2020)    |
| P2C-1C10      | IGHV1-69    | IGKV3-11    | 9             | Ju et al. (2020)    |
| P2B-2G10      | IGHV1-69    | IGKV1-39    | 9             | Ju et al. (2020)    |
| P2B-1F11      | IGHV1-69    | IGLV1-40    | 15            | Ju et al. (2020)    |
| P2B-1D9       | IGHV2-5     | IGLV1-47    | 14            | Ju et al. (2020)    |
| P2B-1E2       | IGHV2-5     | IGKV1-5     | 10            | Ju et al. (2020)    |
| P2B-1E4       | IGHV2-5     | IGLV2-14    | 9             | Ju et al. (2020)    |
| P2B-1F4       | IGHV2-70    | IGLV1-44    | 12            | Ju et al. (2020)    |
| P2C-1A3       | IGHV3-11    | IGKV1-9     | 10            | Ju et al. (2020)    |
| P2B-1D6       | IGHV3-15    | IGLV1-44    | 22            | Ju et al. (2020)    |
| P2C-1B12      | IGHV3-15    | IGLV6-57    | 11            | Ju et al. (2020)    |
| P2B-1F9       | IGHV3-15    | IGKV1-NL1   | 14            | Ju et al. (2020)    |
| P2C-1D5       | IGHV3-23    | IGLV3-21    | 12            | Ju et al. (2020)    |
| P2B-1B4       | IGHV3-30    | IGKV1-39    | 20            | Ju et al. (2020)    |
| P2B-1F2       | IGHV3-33    | IGLV2-11    | 9             | Ju et al. (2020)    |
| P2B-2G4       | IGHV3-33    | IGLV2-11    | 9             | Ju et al. (2020)    |
| P2C-1C8       | IGHV3-33    | IGKV2D-30   | 11            | Ju et al. (2020)    |
| P2A-1B3       | IGHV3-48    | IGKV3-20    | 14            | Ju et al. (2020)    |
| P2B-1B11      | IGHV3-48    | IGKV3-20    | 14            | Ju et al. (2020)    |
| P2B-1B12      | IGHV3-48    | IGKV3-20    | 14            | Ju et al. (2020)    |
| P2B-1C4       | IGHV3-48    | IGKV3-20    | 14            | Ju et al. (2020)    |
| P2B-1E11      | IGHV3-48    | IGKV3-20    | 14            | Ju et al. (2020)    |
| P2B-2H7       | IGHV3-48    | IGKV3-20    | 14            | Ju et al. (2020)    |

|          |           |           |    |                  |
|----------|-----------|-----------|----|------------------|
| P2B-1G12 | IGHV3-48  | IGKV3-20  | 14 | Ju et al. (2020) |
| P2C-1E5  | IGHV3-48  | IGKV3-20  | 14 | Ju et al. (2020) |
| P2B-1A10 | IGHV3-53  | IGKV1-33  | 13 | Ju et al. (2020) |
| P2B-1F5  | IGHV3-53  | IGKV1-NL1 | 12 | Ju et al. (2020) |
| P2C-1D7  | IGHV3-53  | IGKV2D-30 | 10 | Ju et al. (2020) |
| P2B-1G1  | IGHV3-66  | IGKV3-20  | 9  | Ju et al. (2020) |
| P2C-1E1  | IGHV3-66  | IGKV3-11  | 7  | Ju et al. (2020) |
| P2C-1F11 | IGHV3-66  | IGKV3-20  | 9  | Ju et al. (2020) |
| P2A-1A8  | IGHV3-9   | IGLV2-14  | 21 | Ju et al. (2020) |
| P2B-1B10 | IGHV3-9   | IGLV2-14  | 21 | Ju et al. (2020) |
| P2B-1C10 | IGHV3-9   | IGLV2-14  | 21 | Ju et al. (2020) |
| P2B-1D3  | IGHV3-9   | IGLV2-14  | 21 | Ju et al. (2020) |
| P2B-2H4  | IGHV3-9   | IGLV2-14  | 21 | Ju et al. (2020) |
| P2C-1A5  | IGHV3-9   | IGLV2-14  | 21 | Ju et al. (2020) |
| P2C-1A8  | IGHV3-9   | IGLV2-14  | 21 | Ju et al. (2020) |
| P2C-1B1  | IGHV3-9   | IGLV2-14  | 21 | Ju et al. (2020) |
| P2C-1C12 | IGHV3-9   | IGLV2-14  | 21 | Ju et al. (2020) |
| P2C-1A6  | IGHV3-9   | IGLV2-14  | 21 | Ju et al. (2020) |
| P2A-1A9  | IGHV3-9   | IGLV1-40  | 15 | Ju et al. (2020) |
| P2C-1A1  | IGHV3-9   | IGLV1-40  | 15 | Ju et al. (2020) |
| P2B-2G11 | IGHV3-9   | IGLV1-40  | 15 | Ju et al. (2020) |
| P2B-1E12 | IGHV3-9   | IGLV3-20  | 15 | Ju et al. (2020) |
| P2B-2F6  | IGHV4-38  | IGLV2-8   | 18 | Ju et al. (2020) |
| P2A-1B10 | IGHV4-39  | IGLV1-47  | 18 | Ju et al. (2020) |
| P2B-1B9  | IGHV4-39  | IGKV1-NL1 | 7  | Ju et al. (2020) |
| P2B-2F11 | IGHV4-39  | IGKV1-NL1 | 7  | Ju et al. (2020) |
| P2B-1G8  | IGHV4-39  | IGKV1-5   | 9  | Ju et al. (2020) |
| P2B-1A1  | IGHV4-59  | IGLV2-14  | 12 | Ju et al. (2020) |
| P2B-1D11 | IGHV4-59  | IGLV3-25  | 20 | Ju et al. (2020) |
| P2B-1F11 | IGHV4-59  | IGKV1-39  | 13 | Ju et al. (2020) |
| P2C-1A7  | IGHV5-51  | IGLV3-1   | 15 | Ju et al. (2020) |
| P2B-1A12 | IGHV7-4-1 | IGKV1-39  | 14 | Ju et al. (2020) |
| P2B-1G5  | IGHV7-4-1 | IGLV3-21  | 10 | Ju et al. (2020) |
| P3A-1F1  | IGHV3-13  | IGKV1-39  | 15 | Ju et al. (2020) |
| P3A-1G8  | IGHV3-64  | IGLV1-44  | 17 | Ju et al. (2020) |
| P4A-2A10 | IGHV1-46  | IGLV1-40  | 24 | Ju et al. (2020) |
| P4B-1F6  | IGHV1-69  | IGLV2-23  | 13 | Ju et al. (2020) |
| P4B-1E11 | IGHV2-5   | IGLV1-36  | 16 | Ju et al. (2020) |
| P4A-2A2  | IGHV3-23  | IGLV1-51  | 12 | Ju et al. (2020) |
| P4A-2A8  | IGHV3-23  | IGLV3-21  | 9  | Ju et al. (2020) |
| P4A-2C1  | IGHV3-23  | IGKV2-28  | 14 | Ju et al. (2020) |
| P4A-1H5  | IGHV3-30  | IGKV1-39  | 19 | Ju et al. (2020) |
| P4B-1G2  | IGHV3-30  | IGKV1-39  | 19 | Ju et al. (2020) |
| P4A-2B3  | IGHV3-30  | IGKV1-39  | 19 | Ju et al. (2020) |
| P4A-1H6  | IGHV3-30  | IGKV1-39  | 19 | Ju et al. (2020) |
| P4B-1G5  | IGHV3-30  | IGLV3-21  | 20 | Ju et al. (2020) |
| P4A-2E10 | IGHV3-30  | IGKV1-39  | 19 | Ju et al. (2020) |
| P4B-1E3  | IGHV3-30  | IGKV1-39  | 19 | Ju et al. (2020) |
| P4A-2D9  | IGHV3-30  | IGKV1-39  | 19 | Ju et al. (2020) |
| P4B-1F4  | IGHV3-30  | IGKV2-30  | 20 | Ju et al. (2020) |
| P4B-1E7  | IGHV3-43D | IGKV3-1   | 18 | Ju et al. (2020) |
| P4B-1F10 | IGHV3-7   | IGKV3-21  | 11 | Ju et al. (2020) |
| P4A-2D1  | IGHV3-9   | IGKV1-12  | 11 | Ju et al. (2020) |

|          |          |          |    |                  |
|----------|----------|----------|----|------------------|
| P4A-2D2  | IGHV4-39 | IGKV3-20 | 14 | Ju et al. (2020) |
| P4B-1E12 | IGHV4-59 | IGLV1-44 | 9  | Ju et al. (2020) |
| P4A-2C12 | IGHV5-51 | IGLV1-44 | 13 | Ju et al. (2020) |
| P8A-1A8  | IGHV3-23 | IGLV3-21 | 9  | Ju et al. (2020) |
| P8A-1C6  | IGHV3-30 | IGKV1-33 | 18 | Ju et al. (2020) |
| P8A-1A5  | IGHV5-51 | IGLV1-47 | 16 | Ju et al. (2020) |
| P8A-1D5  | IGHV6-1  | IGKV3-20 | 14 | Ju et al. (2020) |
| P5A-1A1  | IGHV1-24 | IGKV2-28 | 13 | Ju et al. (2020) |
| P5A-1C8  | IGHV1-46 | IGKV1-33 | 20 | Ju et al. (2020) |
| P5A-2D5  | IGHV1-46 | IGLV1-40 | 22 | Ju et al. (2020) |
| P5A-2C8  | IGHV1-46 | IGLV2-23 | 13 | Ju et al. (2020) |
| P5A-2E9  | IGHV1-46 | IGLV2-14 | 20 | Ju et al. (2020) |
| P5A-3B8  | IGHV1-46 | IGLV2-23 | 14 | Ju et al. (2020) |
| P5A-3A11 | IGHV1-69 | IGKV1-39 | 12 | Ju et al. (2020) |
| P5A-3C10 | IGHV1-69 | IGLV6-57 | 20 | Ju et al. (2020) |
| P5A-1A2  | IGHV1-8  | IGLV1-40 | 19 | Ju et al. (2020) |
| P5A-1C11 | IGHV1-8  | IGLV3-21 | 15 | Ju et al. (2020) |
| P5A-2F11 | IGHV1-8  | IGKV4-1  | 13 | Ju et al. (2020) |
| P5A-3B9  | IGHV1-8  | IGKV1-36 | 13 | Ju et al. (2020) |
| P5A-2C12 | IGHV2-5  | IGKV3-11 | 14 | Ju et al. (2020) |
| P5A-3C12 | IGHV2-5  | IGKV4-1  | 17 | Ju et al. (2020) |
| P5A-3C3  | IGHV2-5  | IGLV6-57 | 10 | Ju et al. (2020) |
| P5A-3C1  | IGHV3-11 | IGLV3-21 | 11 | Ju et al. (2020) |
| P5A-1C4  | IGHV3-13 | IGKV1-39 | 18 | Ju et al. (2020) |
| P5A-2G8  | IGHV3-13 | IGKV1-39 | 11 | Ju et al. (2020) |
| P5A-2D3  | IGHV3-13 | IGKV1-39 | 14 | Ju et al. (2020) |
| P5A-3B10 | IGHV3-13 | IGKV1-39 | 14 | Ju et al. (2020) |
| P5A-1D8  | IGHV3-13 | IGLV3-19 | 16 | Ju et al. (2020) |
| P5A-2G10 | IGHV3-13 | IGLV3-19 | 16 | Ju et al. (2020) |
| P5A-2H6  | IGHV3-15 | IGLV3-19 | 16 | Ju et al. (2020) |
| P5A-1D6  | IGHV3-23 | IGLV3-21 | 11 | Ju et al. (2020) |
| P5A-2E12 | IGHV3-23 | IGLV3-21 | 12 | Ju et al. (2020) |
| P5A-3D12 | IGHV3-23 | IGLV1-47 | 22 | Ju et al. (2020) |
| P5A-1B6  | IGHV3-30 | IGKV1-33 | 18 | Ju et al. (2020) |
| P5A-2E6  | IGHV3-30 | IGKV1-33 | 18 | Ju et al. (2020) |
| P5A-1B1  | IGHV3-33 | IGKV3-15 | 12 | Ju et al. (2020) |
| P5A-1C5  | IGHV3-33 | IGKV3-15 | 12 | Ju et al. (2020) |
| P5A-2H7  | IGHV3-33 | IGKV3-15 | 12 | Ju et al. (2020) |
| P5A-2G9  | IGHV3-33 | IGLV5-37 | 10 | Ju et al. (2020) |
| P5A-2G11 | IGHV3-33 | IGLV2-14 | 15 | Ju et al. (2020) |
| P5A-1B8  | IGHV3-53 | IGKV1-9  | 7  | Ju et al. (2020) |
| P5A-1D2  | IGHV3-53 | IGLV1-40 | 13 | Ju et al. (2020) |
| P5A-1D1  | IGHV3-53 | IGKV1-9  | 9  | Ju et al. (2020) |
| P5A-2C9  | IGHV3-7  | IGKV3-20 | 12 | Ju et al. (2020) |
| P5A-2E4  | IGHV3-7  | IGKV3-20 | 12 | Ju et al. (2020) |
| P5A-2G12 | IGHV3-7  | IGLV6-57 | 10 | Ju et al. (2020) |
| P5A-2D12 | IGHV3-7  | IGKV2-28 | 16 | Ju et al. (2020) |
| P5A-2F1  | IGHV3-74 | IGLV6-57 | 10 | Ju et al. (2020) |
| P5A-1C10 | IGHV3-9  | IGLV3-21 | 12 | Ju et al. (2020) |
| P5A-2E8  | IGHV3-9  | IGLV3-21 | 11 | Ju et al. (2020) |
| P5A-3A2  | IGHV3-9  | IGLV3-21 | 12 | Ju et al. (2020) |
| P5A-2D6  | IGHV3-9  | IGLV1-40 | 12 | Ju et al. (2020) |
| P5A-1B12 | IGHV3-9  | IGLV1-51 | 15 | Ju et al. (2020) |

|           |           |           |    |                  |
|-----------|-----------|-----------|----|------------------|
| P5A-3A6   | IGHV3-9   | IGLV2-14  | 25 | Ju et al. (2020) |
| P5A-3D9   | IGHV3-9   | IGKV3-15  | 14 | Ju et al. (2020) |
| P5A-1D10  | IGHV3-11  | IGLV2-14  | 19 | Ju et al. (2020) |
| P5A-3A1   | IGHV3-53  | IGKV3-20  | 9  | Ju et al. (2020) |
| P5A-3C8   | IGHV3-53  | IGKV1-9   | 9  | Ju et al. (2020) |
| P5A-2D10  | IGHV4-31  | IGLV6-57  | 10 | Ju et al. (2020) |
| P5A-2G5   | IGHV4-31  | IGLV3-21  | 12 | Ju et al. (2020) |
| P5A-1A12  | IGHV4-39  | IGKV4-1   | 15 | Ju et al. (2020) |
| P5A-2C7   | IGHV4-39  | IGLV2-23  | 14 | Ju et al. (2020) |
| P5A-2F7   | IGHV4-39  | IGLV2-23  | 16 | Ju et al. (2020) |
| P5A-2F9   | IGHV4-39  | IGLV2-23  | 12 | Ju et al. (2020) |
| P5A-1A5   | IGHV4-4   | IGLV2-14  | 12 | Ju et al. (2020) |
| P5A-1C6   | IGHV4-4   | IGLV1-40  | 20 | Ju et al. (2020) |
| P5A-3A10  | IGHV4-4   | IGKV1-39  | 19 | Ju et al. (2020) |
| P5A-1B9   | IGHV4-59  | IGKV4-1   | 20 | Ju et al. (2020) |
| P5A-3A7   | IGHV4-59  | IGKV4-1   | 20 | Ju et al. (2020) |
| P5A-3B1   | IGHV4-59  | IGKV4-1   | 20 | Ju et al. (2020) |
| P5A-3B6   | IGHV4-59  | IGKV4-1   | 20 | Ju et al. (2020) |
| P5A-2C10  | IGHV4-59  | IGLV3-21  | 15 | Ju et al. (2020) |
| P5A-2E5   | IGHV4-59  | IGLV6-57  | 10 | Ju et al. (2020) |
| P5A-2G4   | IGHV4-59  | IGKV1D-16 | 10 | Ju et al. (2020) |
| P5A-2G7   | IGHV4-61  | IGLV2-14  | 18 | Ju et al. (2020) |
| P5A-1B10  | IGHV5-51  | IGKV2-28  | 10 | Ju et al. (2020) |
| P5A-1C9   | IGHV5-51  | IGLV3-19  | 9  | Ju et al. (2020) |
| P5A-2D11  | IGHV5-51  | IGLV1-44  | 11 | Ju et al. (2020) |
| P5A-3B4   | IGHV5-51  | IGLV1-44  | 11 | Ju et al. (2020) |
| P5A-2H3   | IGHV5-51  | IGLV1-44  | 11 | Ju et al. (2020) |
| P5A-2E1   | IGHV5-51  | IGLV3-21  | 10 | Ju et al. (2020) |
| P5A-1B11  | IGHV7-4-1 | IGKV1-39  | 18 | Ju et al. (2020) |
| P5A-2D7   | IGHV7-4-1 | IGKV6-21  | 8  | Ju et al. (2020) |
| P5A-3C9   | IGHV7-4-1 | IGKV6-21  | 8  | Ju et al. (2020) |
| P5A-3D11  | IGHV7-4-1 | IGKV6-21  | 8  | Ju et al. (2020) |
| P16A-1A3  | IGHV1-3   | IGLV6-57  | 9  | Ju et al. (2020) |
| P16A-1A8  | IGHV1-46  | IGLV3-21  | 18 | Ju et al. (2020) |
| P16A-1B5  | IGHV1-46  | IGLV3-21  | 11 | Ju et al. (2020) |
| P16A-1C6  | IGHV1-46  | IGLV3-21  | 14 | Ju et al. (2020) |
| P16A-1C1  | IGHV3-13  | IGKV1-39  | 19 | Ju et al. (2020) |
| P16A-1A5  | IGHV3-33  | IGKV1-33  | 13 | Ju et al. (2020) |
| P16A-1A12 | IGHV3-33  | IGLV1-51  | 17 | Ju et al. (2020) |
| P16A-1B1  | IGHV3-74  | IGLV1-36  | 13 | Ju et al. (2020) |
| P16A-1B3  | IGHV3-9   | IGLV3-1   | 22 | Ju et al. (2020) |
| P16A-1B12 | IGHV4-34  | IGLV1-51  | 14 | Ju et al. (2020) |
| P16A-1B8  | IGHV5-51  | IGLV3-1   | 17 | Ju et al. (2020) |
| P16A-1A7  | IGHV7-4-1 | IGLV3-21  | 12 | Ju et al. (2020) |
| P16A-1A10 | IGHV7-4-1 | IGLV3-21  | 13 | Ju et al. (2020) |
| P22A-1E10 | IGHV1-46  | IGKV3-11  | 13 | Ju et al. (2020) |
| P22A-1D2  | IGHV1-8   | IGLV1-40  | 19 | Ju et al. (2020) |
| P22A-1D8  | IGHV3-23  | IGKV3-15  | 18 | Ju et al. (2020) |
| P22A-1D7  | IGHV3-33  | IGKV1-39  | 11 | Ju et al. (2020) |
| P22A-1D1  | IGHV3-53  | IGKV1-9   | 9  | Ju et al. (2020) |
| P22A-1E8  | IGHV3-9   | IGKV3-15  | 14 | Ju et al. (2020) |
| P22A-1D5  | IGHV4-39  | IGLV2-23  | 12 | Ju et al. (2020) |
| P22A-1E6  | IGHV4-59  | IGKV3-20  | 14 | Ju et al. (2020) |

|          |          |           |    |                       |
|----------|----------|-----------|----|-----------------------|
| BD-494   | IGHV3-53 | IGKV1-9   | 9  | Cao et al. (2020)     |
| BD-498   | IGHV3-66 | IGKV1-9   | 9  | Cao et al. (2020)     |
| BD-500   | IGHV3-53 | IGKV1D-39 | 9  | Cao et al. (2020)     |
| BD-503   | IGHV3-53 | IGKV1D-39 | 9  | Cao et al. (2020)     |
| BD-504   | IGHV3-66 | IGKV1-9   | 9  | Cao et al. (2020)     |
| BD-505   | IGHV3-53 | IGKV1D-33 | 9  | Cao et al. (2020)     |
| BD-506   | IGHV3-53 | IGKV1-9   | 9  | Cao et al. (2020)     |
| BD-507   | IGHV3-53 | IGKV1-9   | 9  | Cao et al. (2020)     |
| BD-508   | IGHV3-53 | IGKV1D-39 | 9  | Cao et al. (2020)     |
| CR3022   | IGHV5-51 | IGKV4-1   | 10 | Yuan et al. (2020)    |
| CC12.1   | IGHV3-53 | IGKV1-9   | -  | Rogers et al. (2020)  |
| CC12.2   | IGHV3-53 | IGKV3-20  | -  | Rogers et al. (2020)  |
| CC12.3   | IGHV3-53 | IGKV3-20  | -  | Rogers et al. (2020)  |
| CC12.4   | IGHV1-2  | IGLV2-8   | -  | Rogers et al. (2020)  |
| CC12.5   | IGHV1-2  | IGLV2-14  | -  | Rogers et al. (2020)  |
| CC12.6   | IGHV1-2  | IGLV2-14  | -  | Rogers et al. (2020)  |
| CC12.7   | IGHV1-2  | IGLV2-14  | -  | Rogers et al. (2020)  |
| CC12.8   | IGHV1-2  | IGLV2-14  | -  | Rogers et al. (2020)  |
| CC12.9   | IGHV1-2  | IGLV2-14  | -  | Rogers et al. (2020)  |
| CC12.10  | IGHV1-2  | IGLV2-14  | -  | Rogers et al. (2020)  |
| CC12.11  | IGHV1-2  | IGLV2-14  | -  | Rogers et al. (2020)  |
| CC12.12  | IGHV1-2  | IGLV2-14  | -  | Rogers et al. (2020)  |
| CC12.13  | IGHV3-53 | IGKV1-33  | -  | Rogers et al. (2020)  |
| CC12.14  | IGHV3-21 | IGKV2-30  | -  | Rogers et al. (2020)  |
| CC12.15  | IGHV3-48 | IGLV1-40  | -  | Rogers et al. (2020)  |
| CC12.16  | IGHV3-33 | IGLV3-21  | -  | Rogers et al. (2020)  |
| CC12.17  | IGHV3-30 | IGLV3-21  | -  | Rogers et al. (2020)  |
| CC12.18  | IGHV1-46 | IGLV6-57  | -  | Rogers et al. (2020)  |
| CC12.19  | IGHV3-23 | IGLV3-21  | -  | Rogers et al. (2020)  |
| COVA1-07 | IGHV1-69 | -         | 13 | Brouwer et al. (2020) |
| COVA1-08 | IGHV3-30 | -         | 12 | Brouwer et al. (2020) |
| COVA1-10 | IGHV3-66 | -         | 19 | Brouwer et al. (2020) |
| COVA1-12 | IGHV1-2  | -         | 13 | Brouwer et al. (2020) |
| COVA1-16 | IGHV1-46 | -         | 20 | Brouwer et al. (2020) |
| COVA1-18 | IGHV3-66 | -         | 10 | Brouwer et al. (2020) |
| COVA2-01 | IGHV3-13 | -         | 12 | Brouwer et al. (2020) |
| COVA2-02 | IGHV4-39 | -         | 13 | Brouwer et al. (2020) |
| COVA2-04 | IGHV3-53 | -         | 10 | Brouwer et al. (2020) |
| COVA2-05 | IGHV5-51 | -         | 18 | Brouwer et al. (2020) |
| COVA2-07 | IGHV3-53 | -         | 7  | Brouwer et al. (2020) |
| COVA2-11 | IGHV3-21 | -         | 17 | Brouwer et al. (2020) |
| COVA2-13 | IGHV1-69 | -         | 10 | Brouwer et al. (2020) |
| COVA2-15 | IGHV3-23 | -         | 20 | Brouwer et al. (2020) |
| COVA2-16 | IGHV1-69 | -         | 14 | Brouwer et al. (2020) |
| COVA2-17 | IGHV1-69 | -         | 11 | Brouwer et al. (2020) |
| COVA2-20 | IGHV3-53 | -         | 15 | Brouwer et al. (2020) |
| COVA2-23 | IGHV1-2  | -         | 18 | Brouwer et al. (2020) |
| COVA2-24 | IGHV5-10 | -         | 18 | Brouwer et al. (2020) |
| COVA2-27 | IGHV1-8  | -         | 14 | Brouwer et al. (2020) |
| COVA2-29 | IGHV4-30 | -         | 18 | Brouwer et al. (2020) |
| COVA2-31 | IGHV1-2  | -         | 16 | Brouwer et al. (2020) |
| COVA2-32 | IGHV1-69 | -         | 13 | Brouwer et al. (2020) |
| COVA2-36 | IGHV5-51 | -         | 14 | Brouwer et al. (2020) |

|          |          |          |    |                        |
|----------|----------|----------|----|------------------------|
| COVA2-39 | IGHV3-53 | -        | 15 | Brouwer et al. (2020)  |
| COVA2-44 | IGHV3-30 | -        | 13 | Brouwer et al. (2020)  |
| COVA2-45 | IGHV1-2  | -        | 22 | Brouwer et al. (2020)  |
| COVA2-46 | IGHV4-39 | -        | 10 | Brouwer et al. (2020)  |
| COVA3-05 | IGHV1-24 | -        | 14 | Brouwer et al. (2020)  |
| COVA3-06 | IGHV1-69 | -        | 16 | Brouwer et al. (2020)  |
| COVA3-09 | IGHV4-59 | -        | 12 | Brouwer et al. (2020)  |
| COVA3-10 | IGHV5-51 | -        | 14 | Brouwer et al. (2020)  |
| B5       | IGHV1-2  | IGKV3-20 | -  | Wu et al. (2020)       |
| B38      | IGHV3-53 | IGKV1-9  | 7  | Wu et al. (2020)       |
| H2       | IGHV3-9  | IGKV1-39 | -  | Wu et al. (2020)       |
| H4       | IGHV1-2  | IGKV2-40 | 17 | Wu et al. (2020)       |
| COV21.1  | IGHV1-58 | IGKV3-20 | 14 | Robbiani et al. (2020) |
| COV21.2  | IGHV1-58 | IGKV3-20 | 14 | Robbiani et al. (2020) |
| COV57.1  | IGHV1-58 | IGKV3-20 | 14 | Robbiani et al. (2020) |
| COV57.2  | IGHV1-58 | IGKV3-20 | 14 | Robbiani et al. (2020) |
| COV107.1 | IGHV1-58 | IGKV3-20 | 14 | Robbiani et al. (2020) |
| COV107.2 | IGHV1-58 | IGKV3-20 | 14 | Robbiani et al. (2020) |
| COV21.3  | IGHV3-30 | IGKV1-39 | 14 | Robbiani et al. (2020) |
| COV21.4  | IGHV3-30 | IGKV1-39 | 12 | Robbiani et al. (2020) |
| COV72.1  | IGHV3-30 | IGKV1-39 | 14 | Robbiani et al. (2020) |
| COV72.2  | IGHV3-30 | IGKV1-39 | 14 | Robbiani et al. (2020) |
| COV72.3  | IGHV3-30 | IGKV1-39 | 14 | Robbiani et al. (2020) |
| 1M-1D2   | IGHV3-64 | IGLV1-47 | 18 | Chi et al. (2020)      |
| 2M-10B11 | IGHV3-66 | IGLV6-57 | 10 | Chi et al. (2020)      |
| 2M-4G4   | IGHV1-46 | IGLV2-23 | 23 | Chi et al. (2020)      |
| CV5      | IGHV1-46 | IGKV4-1  | -  | Seydoux et al. (2020)  |
| CV30     | IGHV3-53 | IGKV3-20 | -  | Seydoux et al. (2020)  |
| CV43     | IGHV3-30 | IGLV6-57 | -  | Seydoux et al. (2020)  |
| CA1      | IGHV1-18 | IGKV3-11 | 21 | Shi et al. (2020)      |
| CB6      | IGHV3-66 | IGKV1-39 | 11 | Shi et al. (2020)      |
| C105     | IGHV3-53 | IGLV2-8  | -  | Barnes et al. (2020)   |

535  
536



537  
538  
539

**Table S3. Hydrogen bonds and salt bridges identified at the antibody-RBD interface using the PISA program.**

| SARS-CoV-2 RBD | Distance [Å] | CC12.1         |
|----------------|--------------|----------------|
| Hydrogen bonds |              |                |
| TYR 473[OH]    | 3.63         | VH SER 53[OG]  |
| TYR 473[OH]    | 2.77         | VH SER 31[O]   |
| ASP 420[OD2]   | 2.51         | VH SER 56[OG]  |
| TYR 421[O]     | 3.39         | VH SER 53[N]   |
| LEU 455[O]     | 2.59         | VH TYR 33[OH]  |
| ALA 475[O]     | 3.02         | VH ASN 32[ND2] |
| ALA 475[O]     | 3.16         | VH THR 28[N]   |
| ASN 487[OD1]   | 3.13         | VH ARG 94[NH1] |
| ASN 487[OD1]   | 3.16         | VH ARG 94[NH2] |
| TYR 489[OH]    | 3.26         | VH ARG 94[NH2] |
| GLN 493[OE1]   | 2.85         | VH TYR 99[OH]  |
| TYR 505[OH]    | 2.95         | VL LEU 91[O]   |
| ARG 403[NH2]   | 2.08         | VL ASN 92[O]   |
| TYR 505[OH]    | 3.11         | VL ASN 92[O]   |
| SER 494[O]     | 3.55         | VL TYR 32[OH]  |
| GLN 498[OE1]   | 3.61         | VL SER 67[OG]  |
| TYR 505[OH]    | 2.94         | VL GLN 90[NE2] |
| TYR 453[OH]    | 3.29         | VL ASN 92[ND2] |
| THR 415[O]     | 2.69         | VL TYR 94[OH]  |
| Salt bridges   |              |                |
| LYS 417[NZ]    | 3.17         | VH ASP 97[OD1] |

540

| SARS-CoV-2 RBD | Distance [Å] | CC12.3         |
|----------------|--------------|----------------|
| Hydrogen bonds |              |                |
| ASP 420[OD2]   | 2.60         | VH SER 56[OG]  |
| TYR 421[OH]    | 3.36         | VH SER 53[OG]  |
| TYR 421[OH]    | 3.72         | VH SER 53[N]   |
| LEU 455[O]     | 2.65         | VH TYR 33[OH]  |
| ARG 457[O]     | 2.81         | VH SER 53[OG]  |
| ALA 475[O]     | 2.97         | VH ASN 32[ND2] |
| ALA 475[O]     | 3.13         | VH THR 28[N]   |
| ASN 487[OD1]   | 2.67         | VH ARG 94[NH2] |
| TYR 489[OH]    | 2.88         | VH ARG 94[NH1] |
| TYR 489[OH]    | 2.71         | VH ARG 94[NH2] |
| SER 477[N]     | 3.88         | VH THR 28[OG1] |
| TYR 473[OH]    | 2.74         | VH SER 31[O]   |
| ARG 457[N]     | 3.64         | VL SER 53[OG]  |
| TYR 495[O]     | 3.87         | VL TYR 32[OH]  |
| TYR 505[OH]    | 3.88         | VL SER 93[N]   |
| TYR 505[OH]    | 3.21         | VL SER 28[O]   |

541

542 **SUPPLEMENTARY REFERENCES**

- 543 40. D. C. Ekiert *et al.*, A highly conserved neutralizing epitope on group 2 influenza A  
544 viruses. *Science* **333**, 843-850 (2011).
- 545 41. Z. Otwinowski, W. Minor, Processing of X-ray diffraction data collected in  
546 oscillation mode. *Methods Enzymol* **276**, 307-326 (1997).
- 547 42. A. J. McCoy *et al.*, Phaser crystallographic software. *J Appl Crystallogr* **40**, 658-  
548 674 (2007).
- 549 43. J. Huo *et al.*, Neutralization of SARS-CoV-2 by destruction of the prefusion  
550 Spike. *bioRxiv* 10.1101/2020.05.05.079202 (2020).
- 551 44. X. Chen *et al.*, Structural basis for antigen recognition by transglutaminase 2-  
552 specific autoantibodies in celiac disease. *J Biol Chem* **290**, 21365-21375 (2015).
- 553 45. P. Emsley, B. Lohkamp, W. G. Scott, K. Cowtan, Features and development of  
554 Coot. *Acta Crystallogr D Biol Crystallogr* **66**, 486-501 (2010).
- 555 46. P. D. Adams *et al.*, PHENIX: a comprehensive Python-based system for  
556 macromolecular structure solution. *Acta Crystallogr D Biol Crystallogr* **66**, 213-  
557 221 (2010).
- 558 47. N. C. Wu *et al.*, In vitro evolution of an influenza broadly neutralizing antibody is  
559 modulated by hemagglutinin receptor specificity. *Nat Commun* **8**, 15371 (2017).
- 560 48. D. Wrapp *et al.*, Cryo-EM structure of the 2019-nCoV spike in the prefusion  
561 conformation. *Science* **367**, 1260-1263 (2020).  
562
